# Supplementary material for: A new avenue to the Dakin reaction in H2O2–WERSA
Source: Royal Society of Chemistry journal article supplement (doi:10.1039/c5ra20133k), 2015-01-01

## Supporting Information

# A new avenue to Dakin reaction in H<sub>2</sub>O<sub>2</sub>–WERSA

Bishwajit Saikia\*<sup>a</sup> and Parinita Borah<sup>b</sup>

<sup>a</sup> Department of Chemistry, Dibrugarh University, Dibrugarh–786004, Assam, India.

E-mail: bishwajitsaikia@gmail.com; Tel: +91 9954314676 (M).

<sup>b</sup> Department of Chemistry, Bahona College, Jorhat–785101, Assam, India.

### Contents

|                                                                |         |
|----------------------------------------------------------------|---------|
| Materials and Methods                                          | P1      |
| General experimental procedure                                 | P1      |
| Characterization data of the product of the Dakin reaction     | P2–P9   |
| References                                                     | P10     |
| <sup>1</sup> H and <sup>13</sup> C NMR spectra of the products | P11–P42 |

## Materials and Methods

Compounds were purchased from Aldrich and Alfa Aesar. All other chemicals were purchased from commercial sources and used without further purification.  $^1\text{H}$  NMR and  $^{13}\text{C}$  NMR spectra were recorded at 500 MHz using TMS as internal standard. Chemical shifts are recorded in reference to residual solvent peaks (DMSO- $d_6$  = 2.50 ppm,  $\text{CDCl}_3$  = 7.26 ppm). TLC experiments were performed on EMD Merck F<sub>254</sub>, 250 mm thickness. Column chromatography was performed with Merck silica gel (100–200 mesh).

## General experimental procedure

In a round bottomed flask, hydroxylated benzaldehyde (1 mmol) in WERSA (3 mL) was taken and  $\text{H}_2\text{O}_2$  (2 equiv.) was added to the same and stirred at room temperature for a time period as mentioned in **Table 2** in the manuscript. The progress of the reaction was monitored by TLC. After completion of the reaction it was extracted with ethyl acetate (3 x 10 mL). The combined organic extract was dried over anhydrous  $\text{Na}_2\text{SO}_4$  and concentrated under reduced pressure. The product was purified by column chromatography over silica gel using *n*-hexane/ethyl acetate (3:1 v/v) to get the desired coupling product. The products were characterized by IR,  $^1\text{H}$  NMR and  $^{13}\text{C}$  NMR spectroscopy.

## Characterization data of the product of the Dakin reaction<sup>1-7</sup>

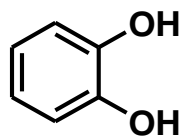

### Catechol (Table 2; Entry 1)

<sup>1</sup>H NMR (500 MHz, CDCl<sub>3</sub>) δ 6.90–6.84 (m, 2 H), 6.84–6.78 (m, 2 H), 5.38–5.29 ppm (m, 2 H); <sup>13</sup>C NMR (125 MHz, CDCl<sub>3</sub>) δ 143.3, 121.1, 115.4 ppm; Column chromatography on silica gel using *n*-hexane/ethyl acetate (3:1 v/v).

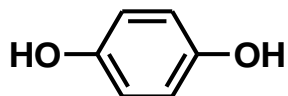

### Hydroquinone (Table 2; Entry 2)

<sup>1</sup>H NMR (500 MHz, DMSO-d<sub>6</sub>) δ 8.63 (s, 2 H), 6.56 ppm (s, 4 H); <sup>13</sup>C NMR (125 MHz, DMSO-d<sub>6</sub>) δ 150.06, 116.05 ppm; Column chromatography on silica gel using *n*-hexane/ethyl acetate (3:1 v/v).

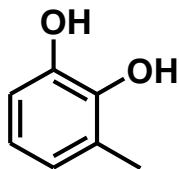

### 3-Methylcatechol (Table 2; Entry 3)

$^1\text{H}$  NMR (500MHz, DMSO- $d_6$ )  $\delta$  8.82 (s, 1 H), 8.2 (s, 1 H), 6.58 (t,  $J = 8$  Hz, 1 H), 6.44 (d,  $J = 6$  Hz, 1 H), 6.42 (d,  $J = 3.5$  Hz, 1 H), 2.37 ppm (s, 3 H);  $^{13}\text{C}$  NMR (125MHz, DMSO- $d_6$ )  $\delta$  144.8, 142.2, 125.8, 123.2, 120.6, 113.3, 15.09 ppm; Column chromatography on silica gel using *n*-hexane/ethyl acetate (3:1 v/v).

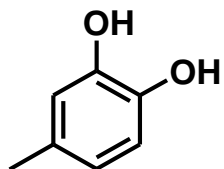

### 4-Methylbenzene-1,2-diol (Table 2; Entry 4)

$^1\text{H}$  NMR (500 MHz, DMSO- $d_6$ )  $\delta$  8.70 (s, 1 H), 8.56 (s, 1 H), 6.59 (d,  $J = 1.0$  Hz, 1 H), 6.52 (s, 1 H), 6.40 (d,  $J = 8$  Hz, 1 H), 2.12 ppm (s, 3 H);  $^{13}\text{C}$  NMR (125 MHz, DMSO- $d_6$ )  $\delta$  145.2, 143.2, 128.2, 119.8, 116.7, 115.7, 20.6 ppm; Column chromatography on silica gel using *n*-hexane/ethyl acetate (3:1 v/v).

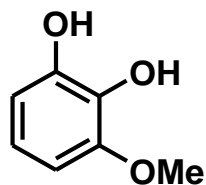

### 3-Methoxycatechol (Table 2; Entry 5)

$^1\text{H}$  NMR (500 MHz, DMSO- $d_6$ )  $\delta$  8.80 (s, 1 H), 8.19 (s, 1 H), 6.55 (t,  $J = 3.5$  Hz, 1 H), 6.46 (d,  $J = 1.5$  Hz, 1 H), 6.44 (d,  $J = 4.5$  Hz, 1 H), 3.76 ppm (s, 3 H);  $^{13}\text{C}$  NMR (125 MHz, DMSO- $d_6$ )  $\delta$  148.8, 146.2, 134.4, 118.6, 109.3, 103.8, 50.09 ppm; Column chromatography on silica gel using *n*-hexane/ethyl acetate (3:1 v/v).

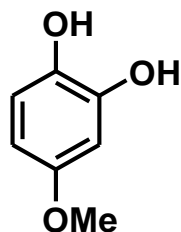

### 4-Methoxycatechol (Table 2; Entry 6)

$^1\text{H}$  NMR (500 MHz, DMSO- $d_6$ )  $\delta$  8.80 (s, 1 H), 8.20 (s, 1 H), 6.58–6.54 (m, 1 H), 6.41 (d,  $J = 4.0$  Hz, 1 H), 6.39 (s, 1 H), 3.73 ppm (s, 3 H);  $^{13}\text{C}$  NMR (125 MHz, DMSO- $d_6$ )  $\delta$  150.09, 148.2, 135.1, 118.7, 109.7, 103.7, 56.2 ppm; Column chromatography on silica gel using *n*-hexane/ethyl acetate (3:1 v/v).

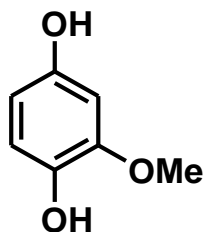

### 2-Methoxybenzene-1,4-diol (Table 2; Entry 7)

$^1\text{H}$  NMR (500 MHz,  $\text{CDCl}_3$ )  $\delta$  6.50 (d,  $J = 2.5$  Hz, 1 H), 6.43–6.40 (m, 1 H), 6.34 (s, 1 H), 5.23 (s, 1 H), 5.02 (s, 1 H), 3.84 ppm (s, 3 H);  $^{13}\text{C}$  NMR (125 MHz,  $\text{CDCl}_3$ )  $\delta$  149.3, 147.8, 139.6, 114.4, 106.9, 99.8, 56.4 ppm; Column chromatography on silica gel using *n*-hexane/ethyl acetate (3:1 v/v).

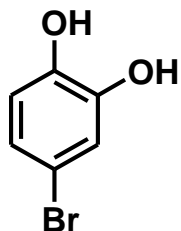

### 4-Bromocatechol (Table 2; Entry 8)

$^1\text{H}$  NMR (500 MHz,  $\text{DMSO-d}_6$ )  $\delta$  9.37 (brs, 1 H), 9.15 (brs, 1 H), 6.77 (d,  $J = 2.5$  Hz, 1 H), 6.74–6.70 (m, 1 H), 6.60 ppm (d,  $J = 2.0$  Hz, 1 H);  $^{13}\text{C}$  NMR (125 MHz,  $\text{DMSO-d}_6$ )  $\delta$  147.07, 145.31, 122.04, 118.4, 117.5, 109.9 ppm; Column chromatography on silica gel using *n*-hexane/ethyl acetate (3:1 v/v).

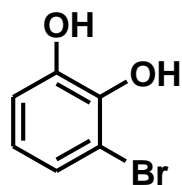

### 3-Bromocatechol (Table 2; Entry 9)

$^1\text{H}$  NMR (500 MHz, DMSO- $d_6$ )  $\delta$  10.13 (brs, 1 H), 9.92 (brs, 1 H), 6.76 (d,  $J = 2.4$  Hz, 1 H), 6.74–6.71 (m, 1 H), 6.60 ppm (d,  $J = 2.3$  Hz, 1 H);  $^{13}\text{C}$  NMR (125 MHz, DMSO- $d_6$ )  $\delta$  147.8, 146.6, 125.8, 124.7, 116.9, 111.8 ppm; Column chromatography on silica gel using *n*-hexane/ethyl acetate (3:1 v/v).

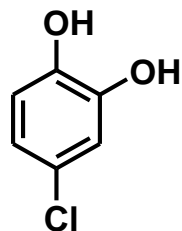

### 4-Chlorocatechol (Table 2; Entry 10)

$^1\text{H}$  NMR (500 MHz, DMSO- $d_6$ )  $\delta$  9.38 (brs, 1 H), 9.16 (brs, 1 H), 6.75–6.73 (m, 1 H), 6.71–6.69 (m, 1 H), 6.62–6.60 ppm (m, 1 H);  $^{13}\text{C}$  NMR (125 MHz,  $\text{CDCl}_3$ )  $\delta$  146.7, 144.8, 122.4, 119.06, 116.8, 115.7 ppm; Column chromatography on silica gel using *n*-hexane/ethyl acetate (3:1 v/v).

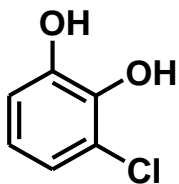

### 3-Chlorocatechol (Table 2; Entry 11)

$^1\text{H}$  NMR (500 MHz, DMSO- $d_6$ )  $\delta$  9.28 (brs, 1 H), 9.12 (brs, 1 H), 6.77–6.71 (m, 1 H), 6.69–6.67 (m, 1 H), 6.62–6.59 ppm (m, 1 H);  $^{13}\text{C}$  NMR (125 MHz,  $\text{CDCl}_3$ )  $\delta$  145.7, 144.1, 123.9, 122.9, 122.4, 115.2 ppm; Column chromatography on silica gel using *n*-hexane/ethyl acetate (3:1 v/v).

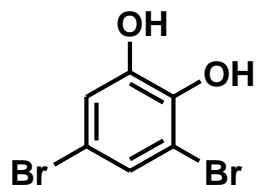

### 3,5-Dibromocatechol (Table 2; Entry 12)

$^1\text{H}$  NMR (500 MHz, DMSO- $d_6$ )  $\delta$  10.31 (brs, 1 H), 9.45 (brs, 1 H), 7.09 (s, 1 H), 6.91 ppm (s, 1 H);  $^{13}\text{C}$  NMR (125 MHz, DMSO- $d_6$ )  $\delta$  147.7, 143.1, 124.6, 117.4, 110.7, 110.1 ppm; Column chromatography on silica gel using *n*-hexane/ethyl acetate (3:1 v/v).



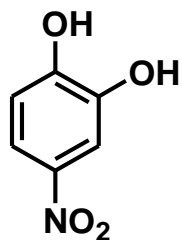

#### 4-Nitrocatechol (Table 2; Entry 13)

$^1\text{H}$  NMR (500 MHz, DMSO- $d_6$ )  $\delta$  10.29 (brs, 2 H), 7.67 (d,  $J = 8.5$  Hz, 1 H), 7.60 (s, 1 H), 6.9 ppm (d,  $J = 8$  Hz, 1 H);  $^{13}\text{C}$  NMR (125 MHz, DMSO- $d_6$ )  $\delta$  153.2, 145.7, 139.8, 116.8, 115.3, 110.7 ppm; Column chromatography on silica gel using *n*-hexane/ethyl acetate (3:1 v/v).

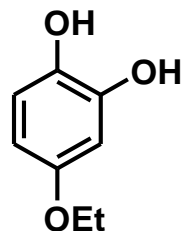

#### 4-Ethoxycatechol (Table 2; Entry 14)

$^1\text{H}$  NMR (500 MHz, DMSO- $d_6$ )  $\delta$  8.80 (s, 1 H), 8.02 (s, 1 H), 6.54–6.50 (m, 1 H), 6.43–6.39 (m, 2 H), 4.0 (q,  $J = 5$  Hz, 2 H), 1.33 ppm (t,  $J = 10$  Hz, 3 H);  $^{13}\text{C}$  NMR (125 MHz, DMSO- $d_6$ )  $\delta$  147.9, 146.3, 134.8, 118.6, 109.3, 105.2, 64.3, 15.1 ppm; Column chromatography on silica gel using *n*-hexane/ethyl acetate (3:1 v/v).

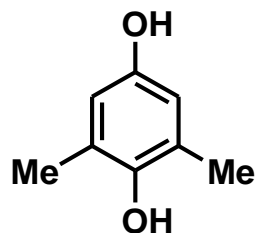

### 2,6-Dimethylhydroquinone (Table 2; Entry 15)

$^1\text{H}$  NMR (500MHz, DMSO- $d_6$ )  $\delta$  8.43 (s, 1 H), 7.38 (s, 1 H), 6.27 (s, 2 H), 2.03 ppm (s, 6 H);  $^{13}\text{C}$  NMR (125 MHz, DMSO- $d_6$ )  $\delta$  150.2, 145.8, 125.9, 115.07, 17.3 ppm; Column chromatography on silica gel using *n*-hexane/ethyl acetate (3:1 v/v).

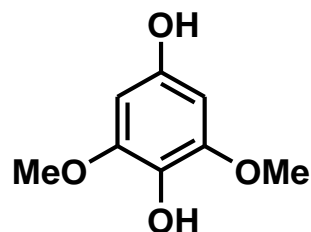

### 2,6-Dimethoxy-1,4-benzenediol (Table 2; Entry 16)

$^1\text{H}$  NMR (500 MHz,  $\text{CDCl}_3$ )  $\delta$  5.84 (s, 2 H), 3.81 ppm (s, 6 H);  $^{13}\text{C}$  NMR (125 MHz,  $\text{CDCl}_3$ )  $\delta$  143.3, 141.1, 124.1, 122.05, 119.2, 113.4, 56.7 ppm; Column chromatography on silica gel using *n*-hexane/ethyl acetate (3:1 v/v).

## References

1. S. Chen, M. S. Hossain and F. W. Foss Jr., *Org. Lett.*, 2012, **14**, 2806–2809.
2. S. Chen and F. W. Foss Jr., *Org. Lett.*, 2012, **14**, 5150–5153.
3. R. S. Varma and K. P. Naicker, *Org. Lett.*, 1999, **1**, 189–191.
4. R. Bernini, A. Coratti, G. Provenzano, G. Fabrizi and D. Tofani, *Tetrahedron*, 2005, **61**, 1821–1825.
5. A. Roy, K. R. Reddy, P. K. Mohanta, H. Ila and H. Junjappa, *Synth. Commun.*, 1999, **29**, 3781–3791.
6. T. V. Hansen and L. Skattebol, *Tetrahedron Lett.*, 2005, **46**, 3357–3358.
7. E. T. da Silva, C. A. Camara, O. A. C. Antunes, E. J. Barreiro and C. A. M. Fraga, *Synth. Commun.*, 2008, **38**, 784–788.

Name of Sample: NS-B(1)  
Spectrum No : 8297

<sup>1</sup>H NMR spectra of

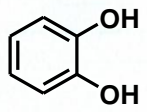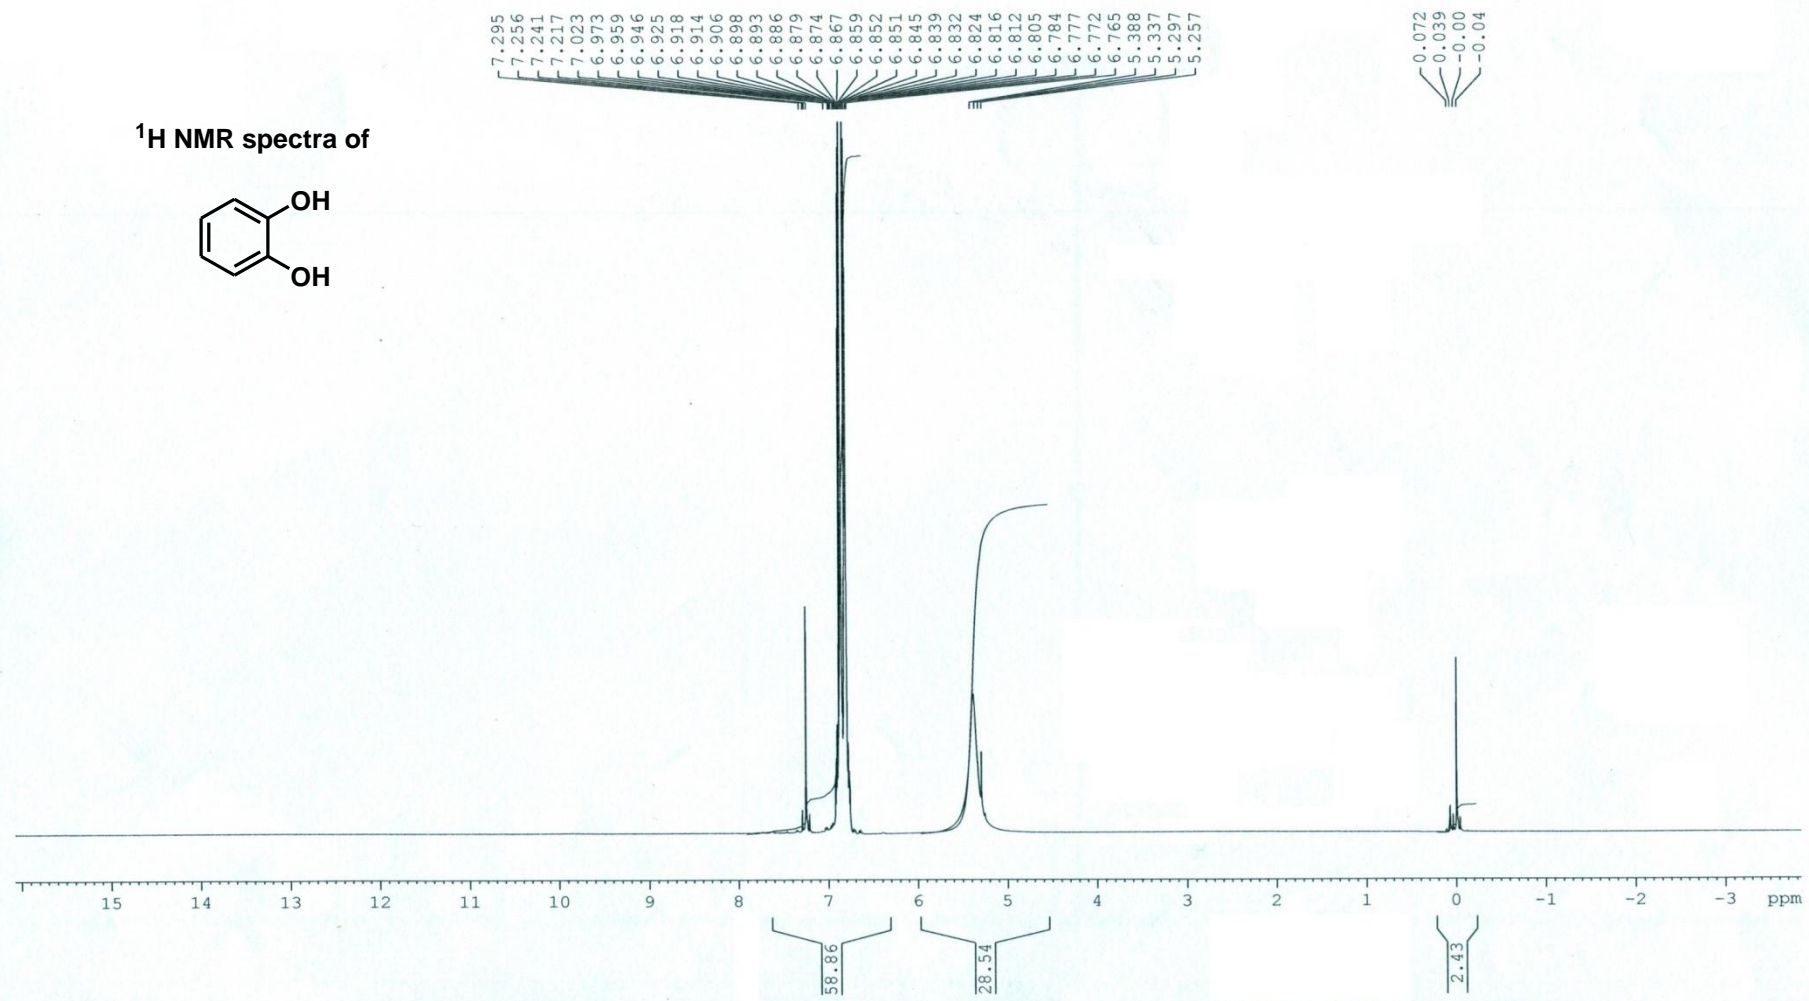

Name of Sample: NS-B(1)  
Spectrum No : 8299

<sup>13</sup>C NMR spectra of

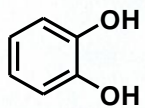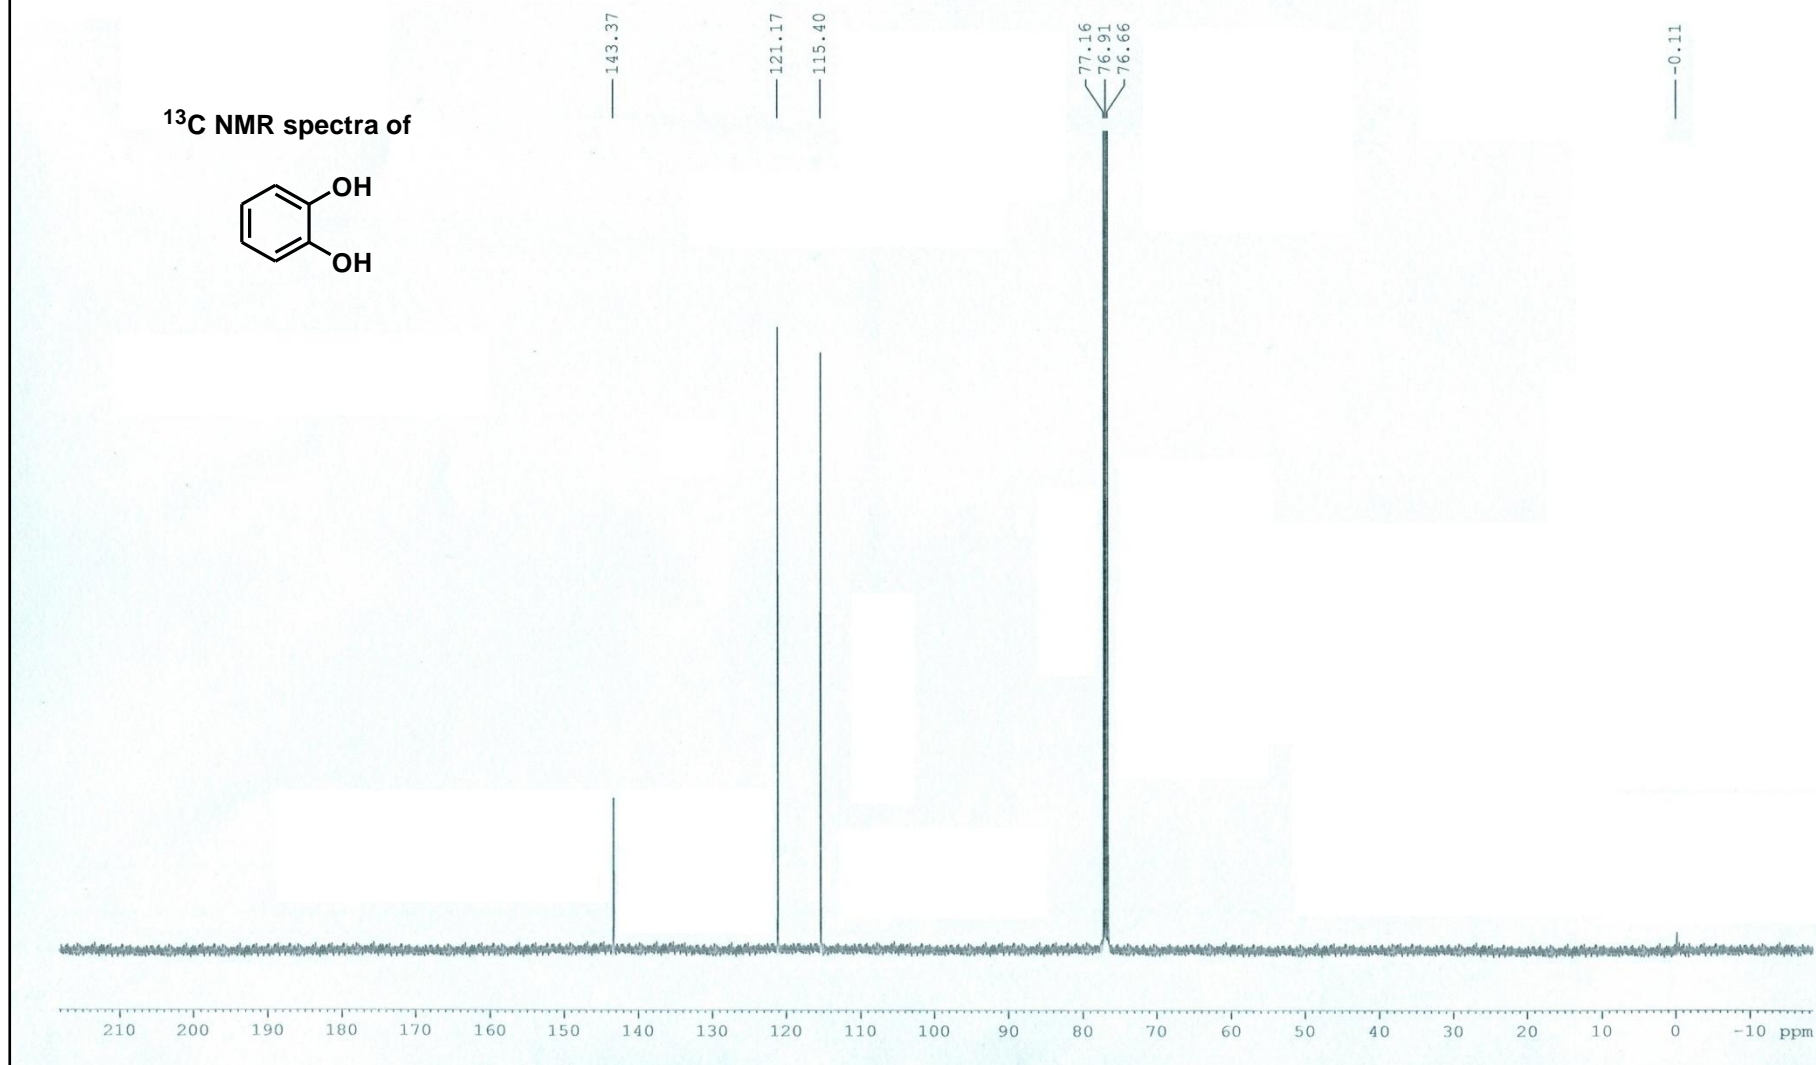

<sup>1</sup>H NMR spectra of

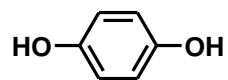

Name of Sample: NS-B (2)  
Spectrum No : 8320

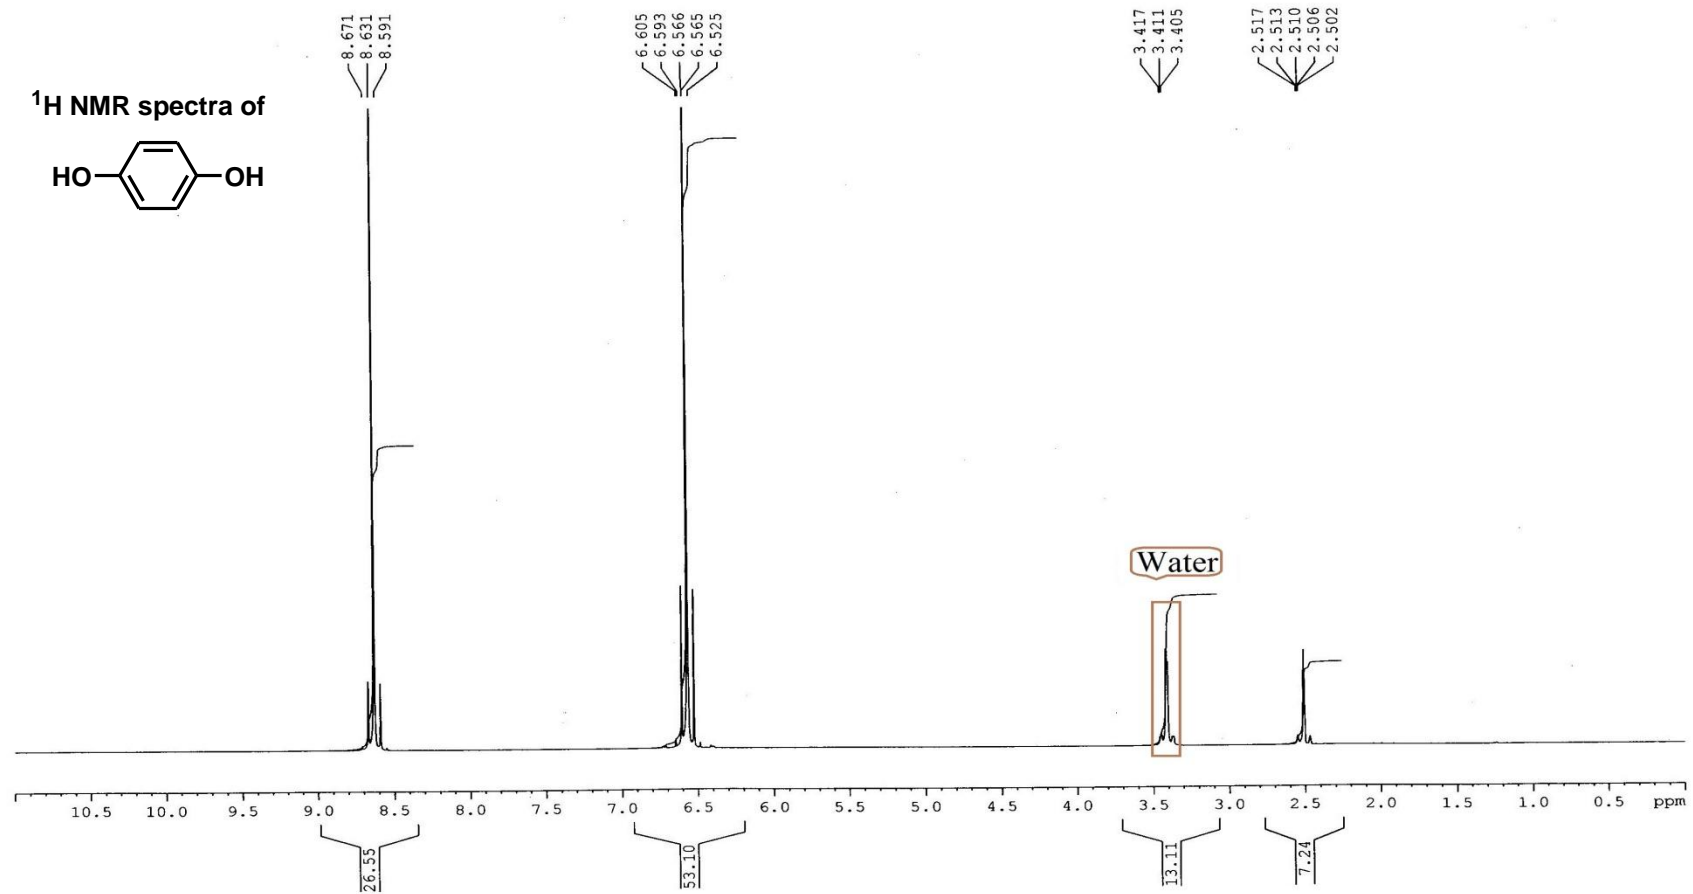

Name of Sample: NS-B(2)  
Spectrum No : 8323

<sup>13</sup>C NMR spectra of

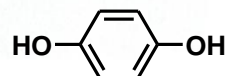

150.06

116.05

40.30  
40.22  
40.13  
40.05  
39.97  
39.80  
39.63  
39.47  
39.30

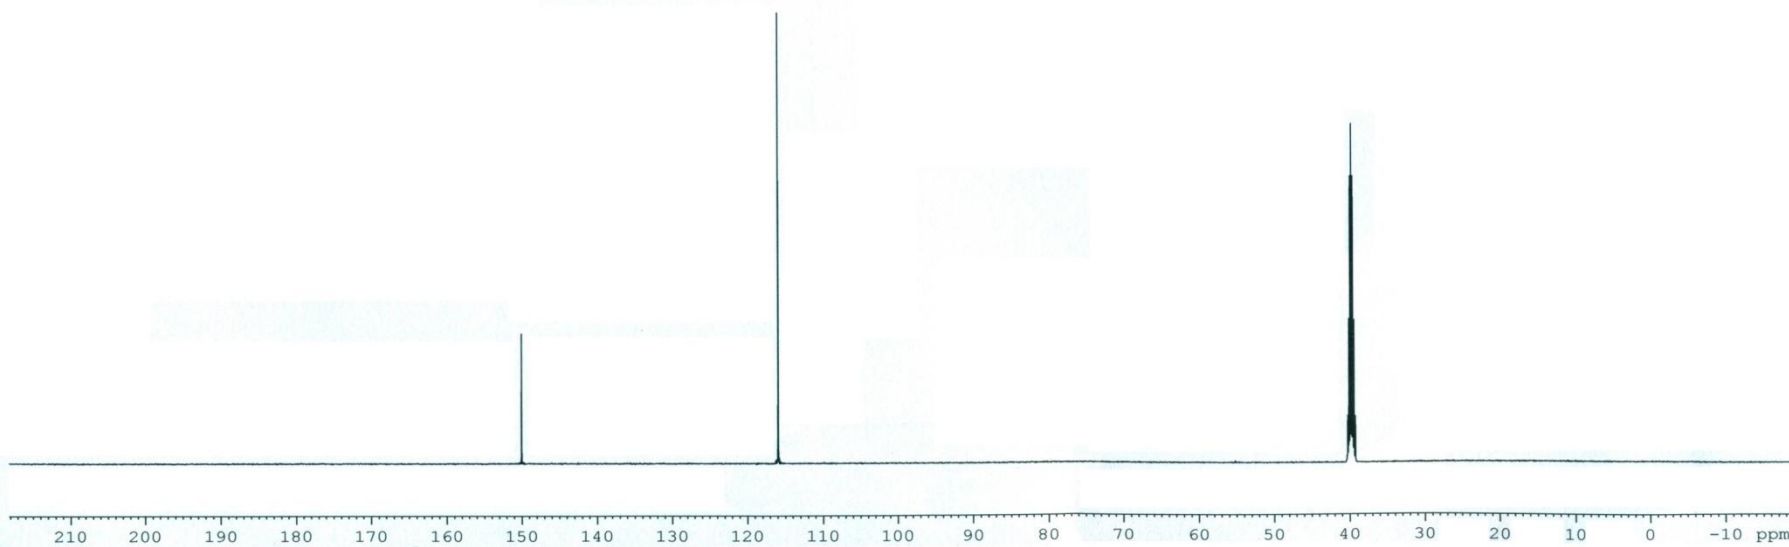

Name of Sample: NS-B(3)  
Spectrum No : 8338

<sup>1</sup>H NMR spectra of

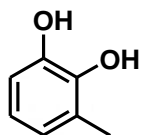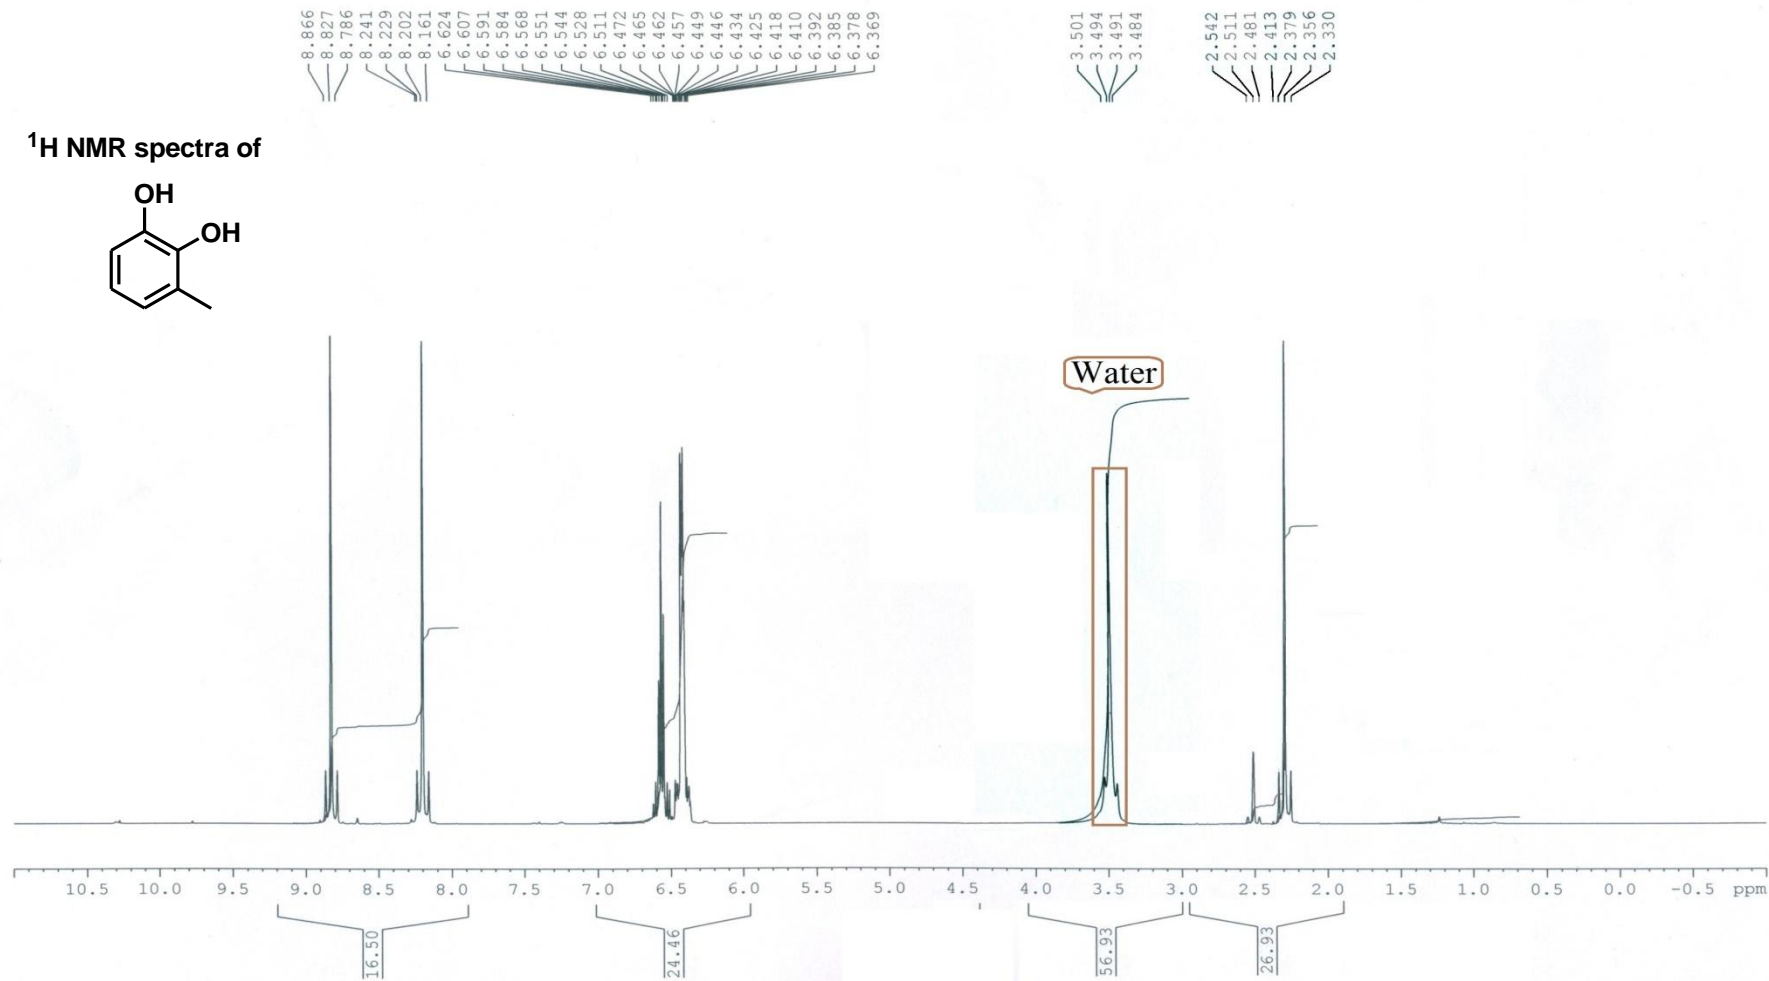



Name of Sample: NS-B(3)  
Spectrum No : 8347

<sup>13</sup>C NMR spectra of

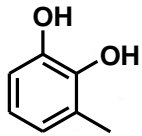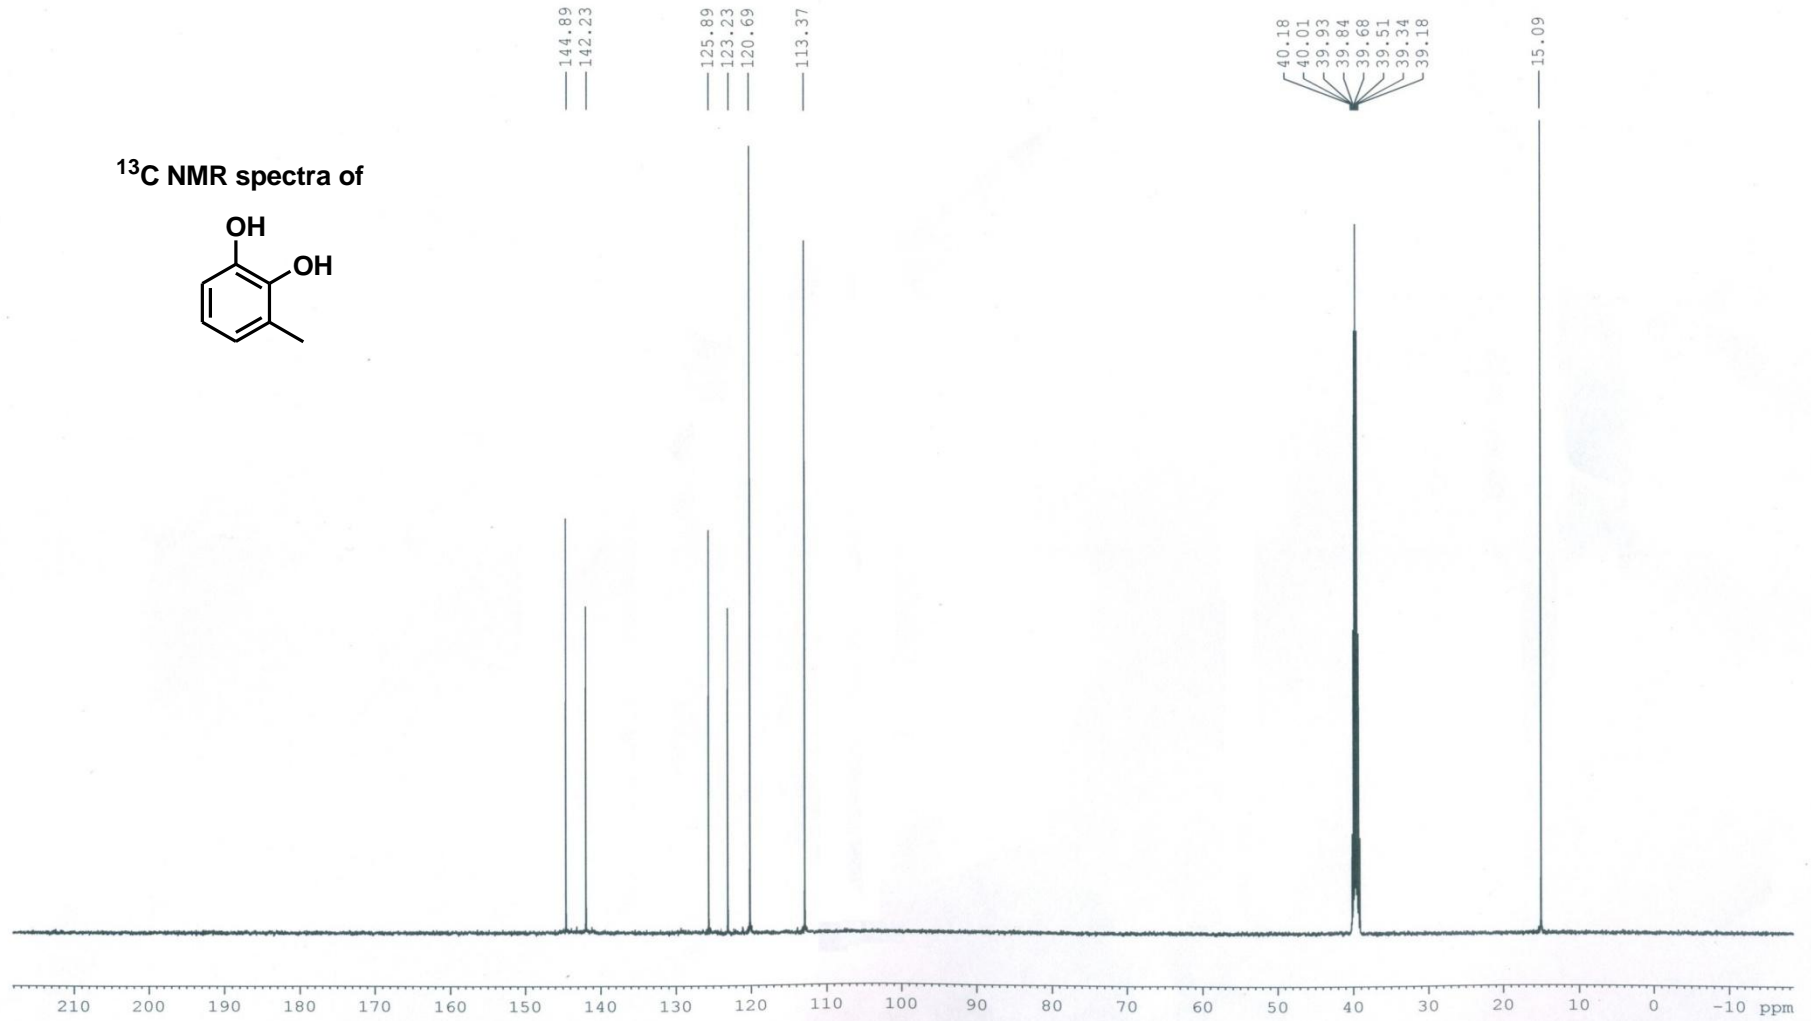

Name of Sample: NS-B(4)

Spectrum No.: 8427

<sup>1</sup>H NMR spectra of

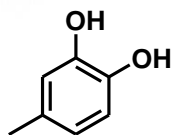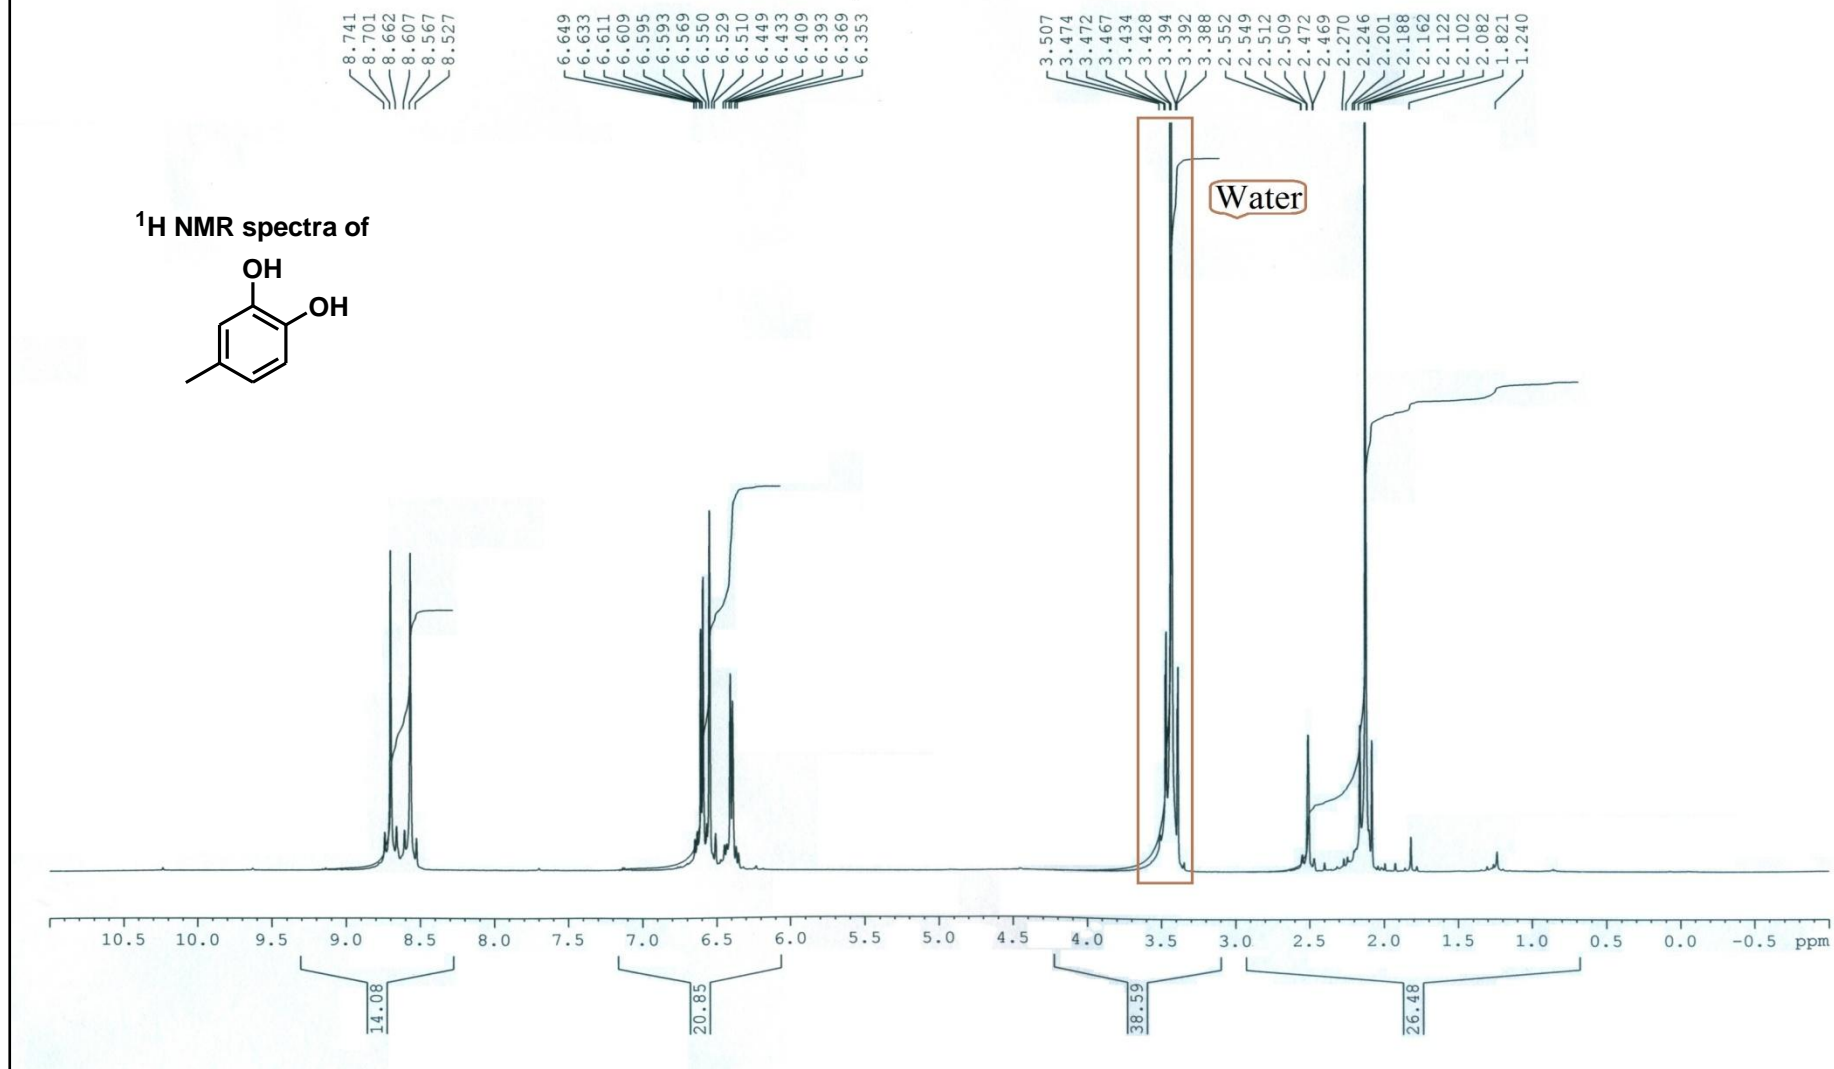

Name of Sample: NS-B(4)  
Spectrum No.: 8430

<sup>13</sup>C NMR spectra of

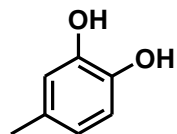

145.29  
143.20  
143.16

128.23

119.81  
116.71  
115.76

40.37  
40.28  
40.20  
40.11  
40.03  
39.94  
39.86  
39.78  
39.61  
39.44  
39.28  
20.68  
20.65

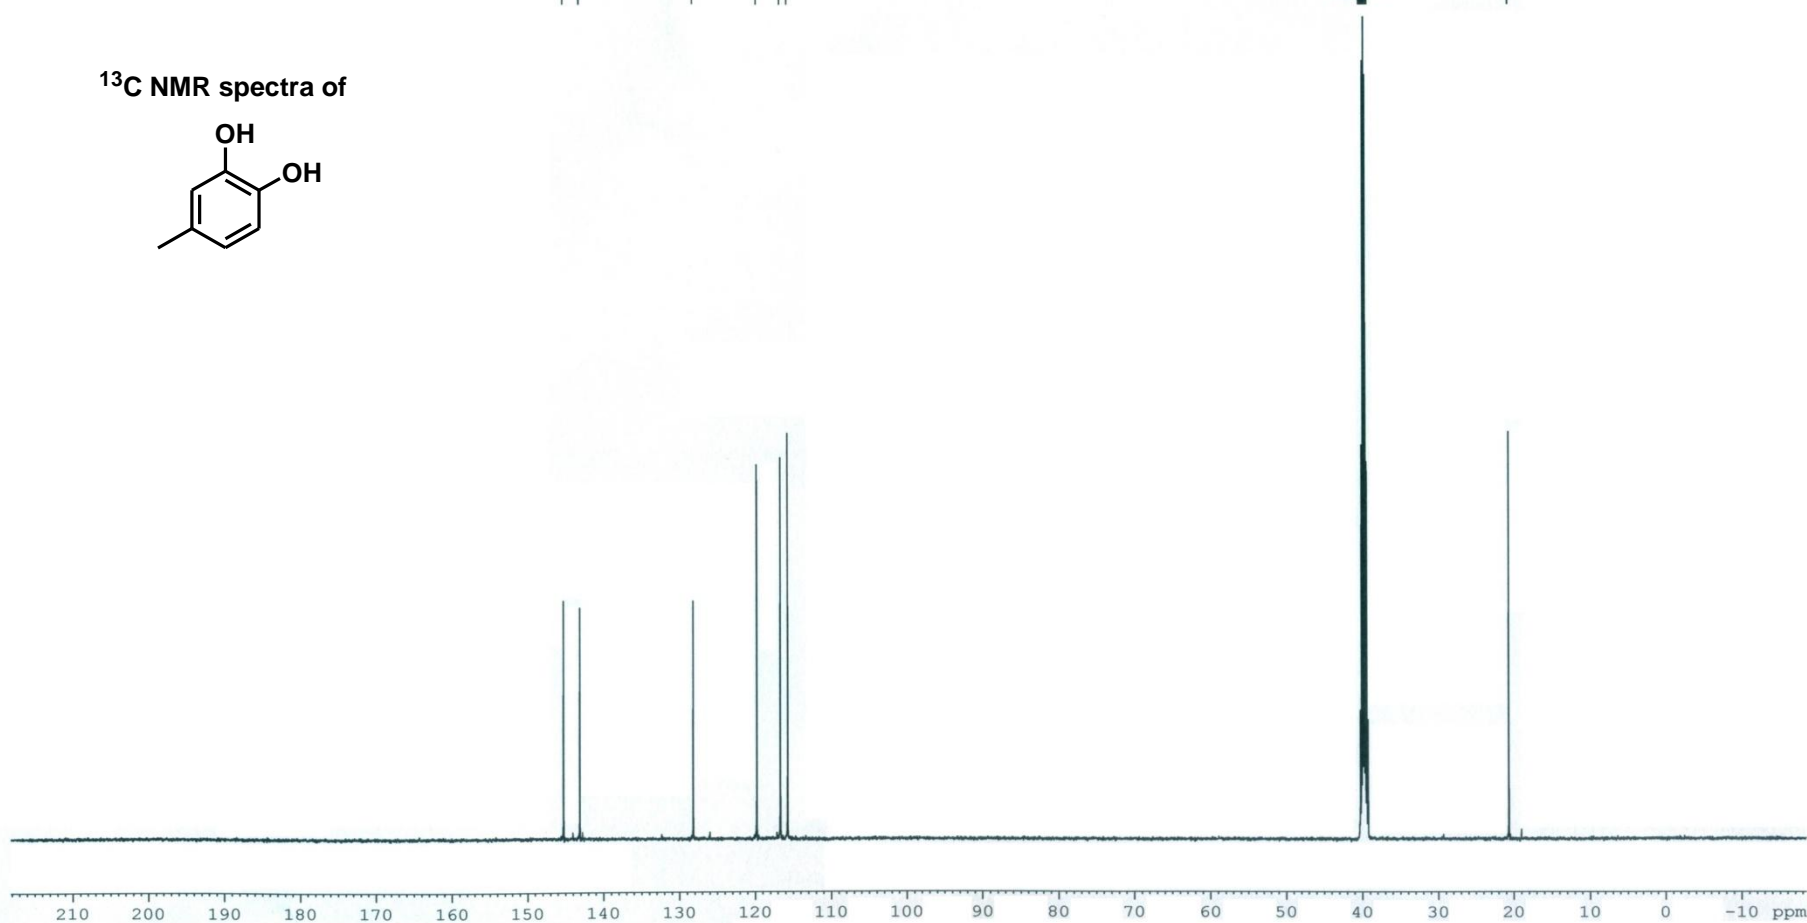

<sup>1</sup>H NMR spectra of

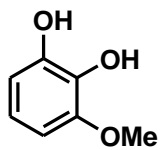

Name of Sample: NS-B(5)  
Spectrum No.: 8550

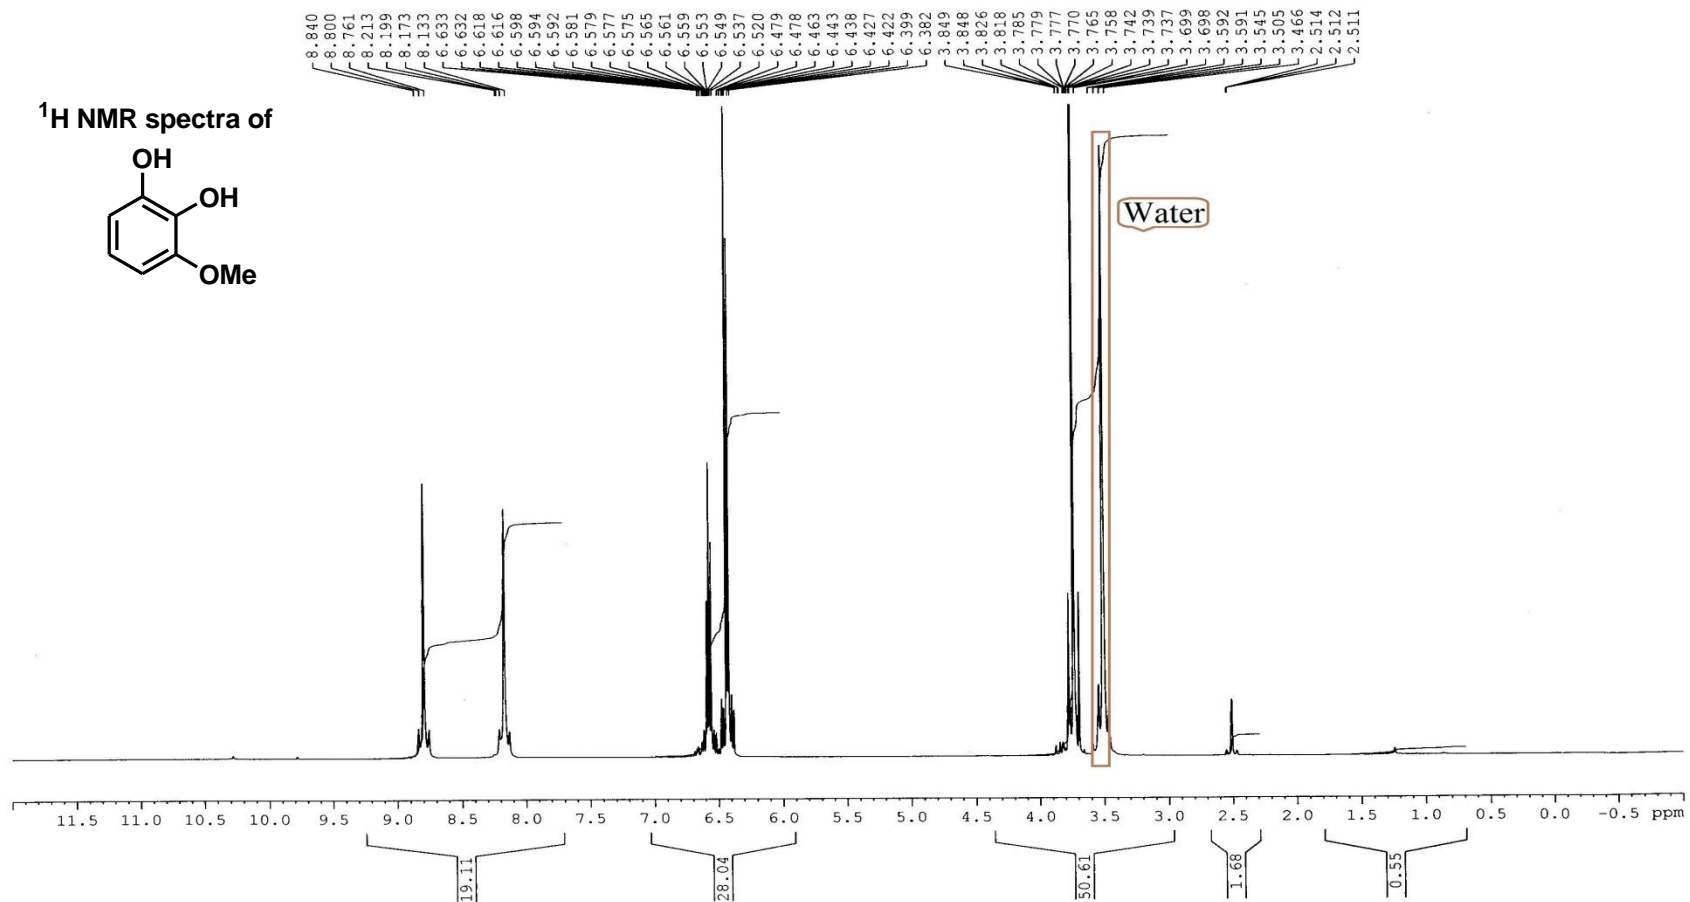

Name of Sample: NS-B(5)  
Spectrum No.: 8558

<sup>13</sup>C NMR spectra of

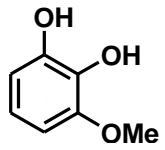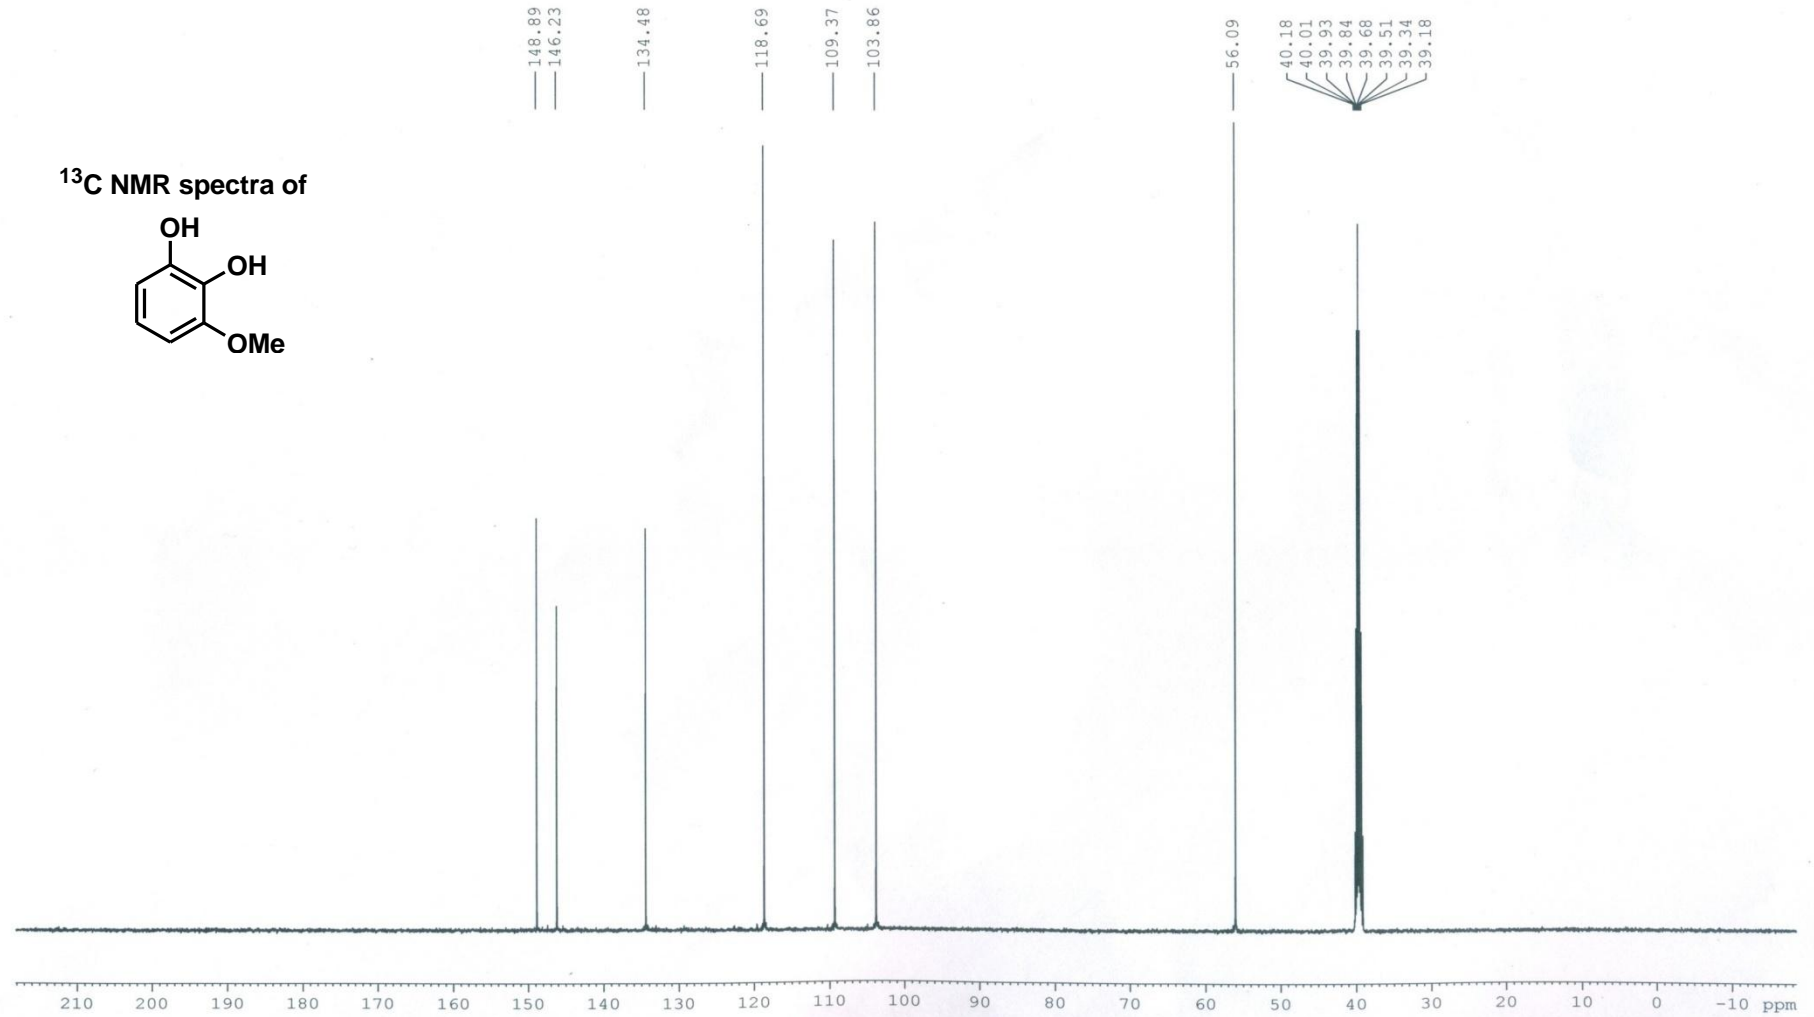

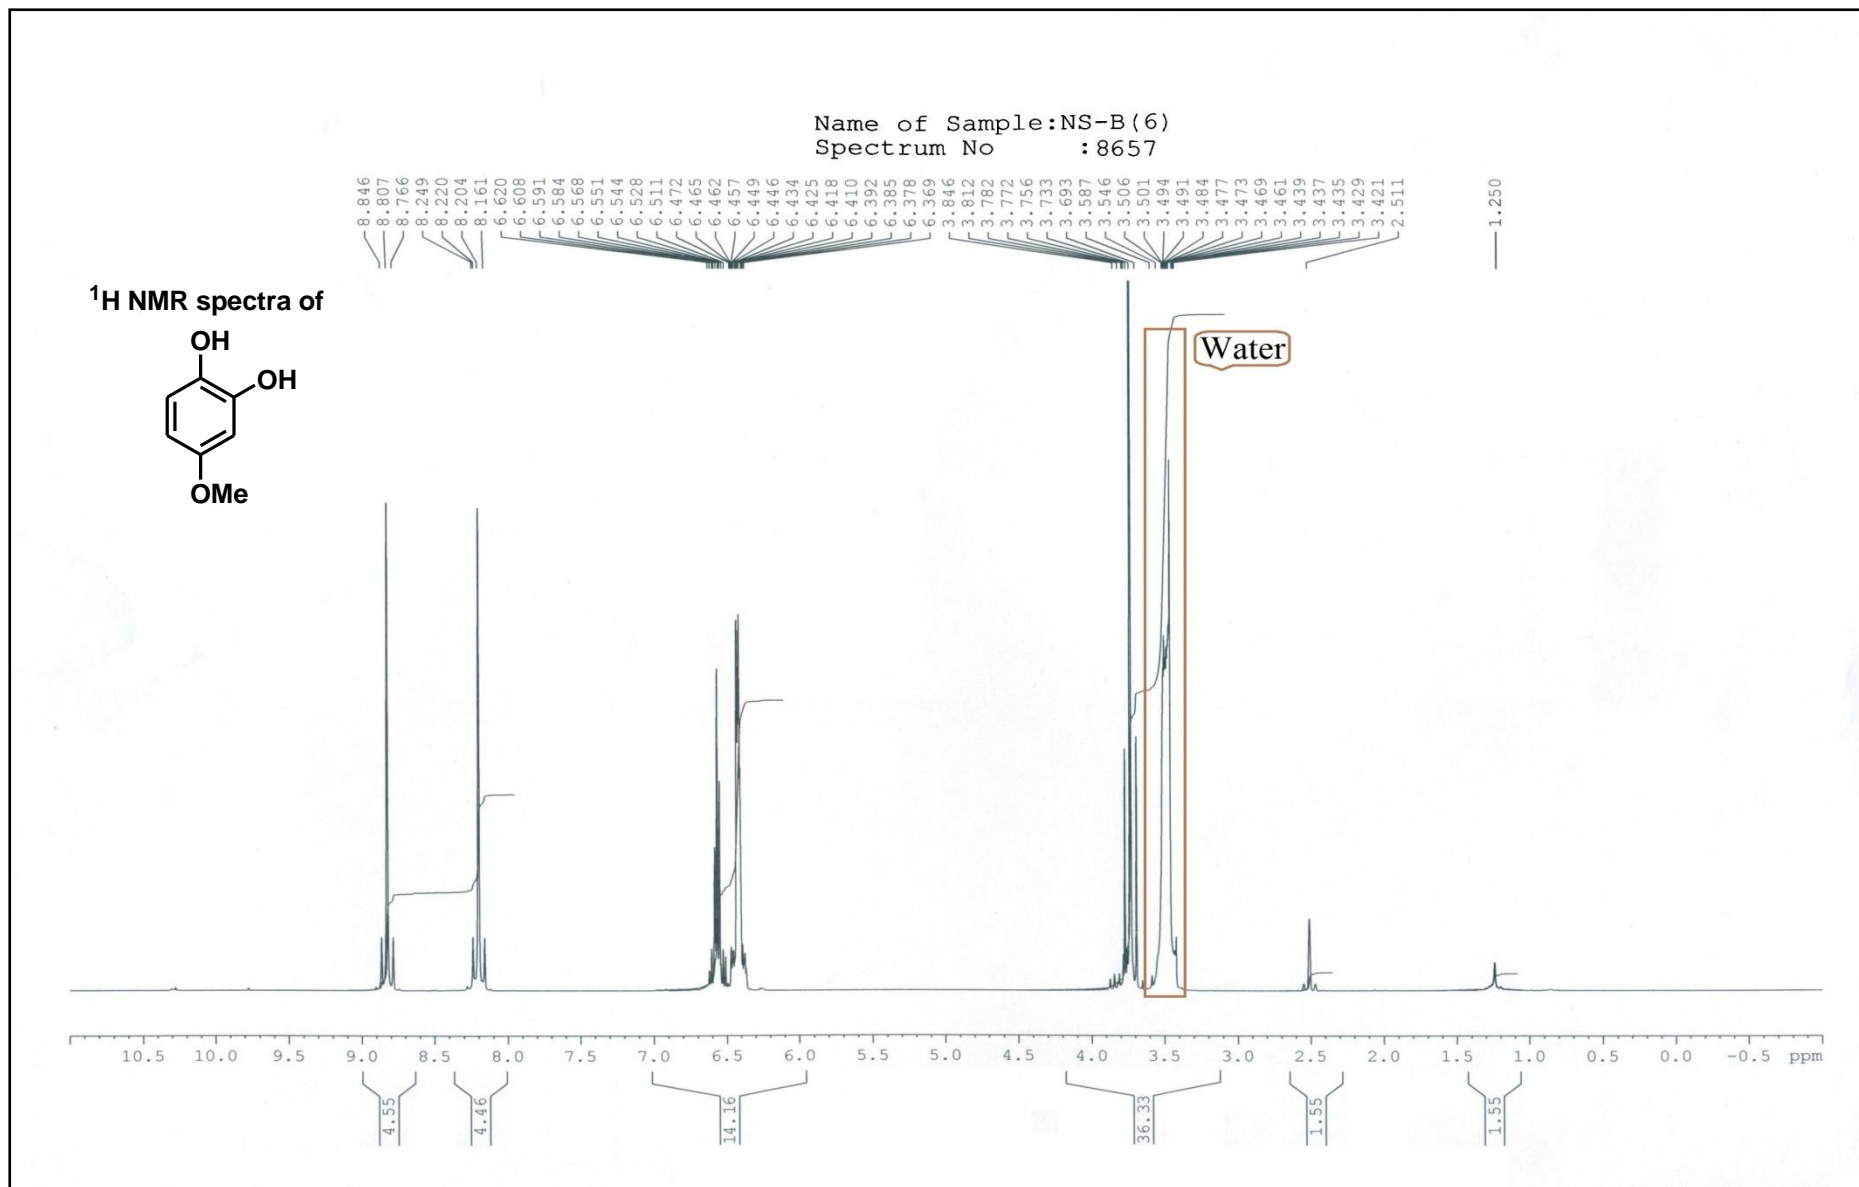

Name of Sample: NS-B(6)  
Spectrum No : 8667

<sup>13</sup>C NMR spectra of

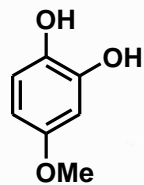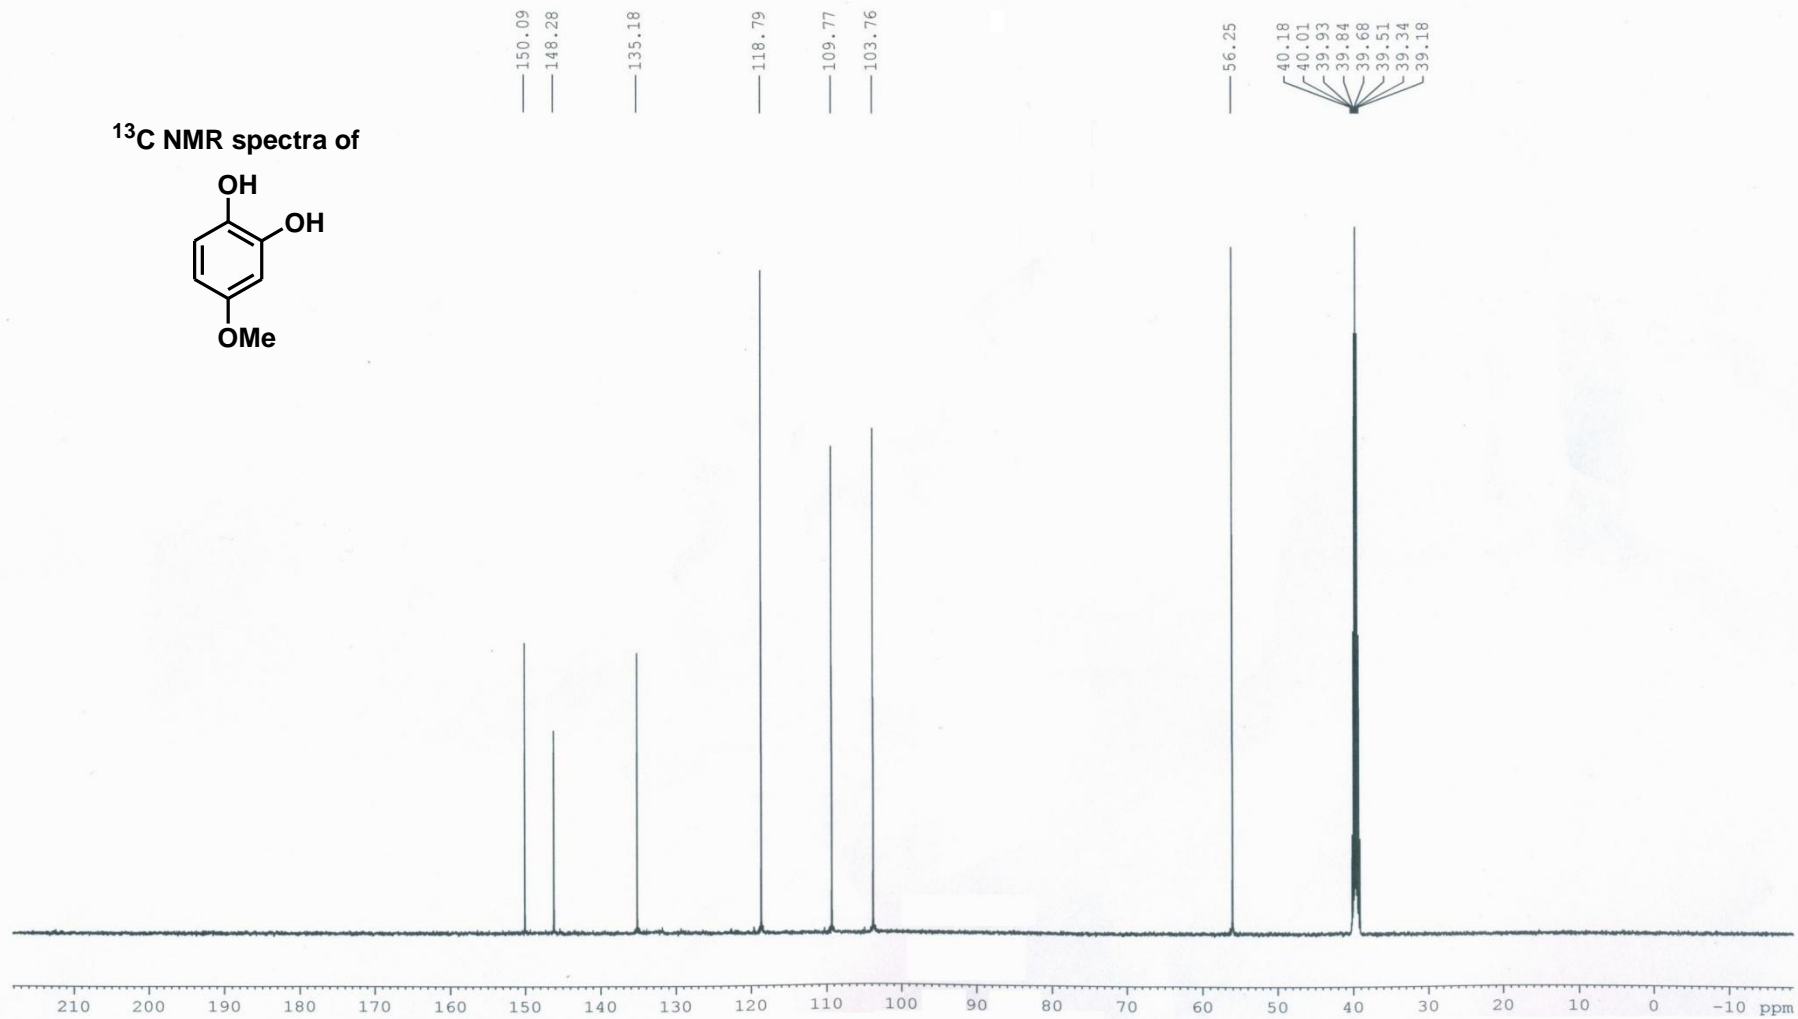

<sup>1</sup>H NMR spectra of

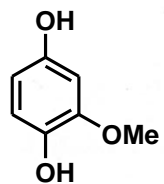

Name of Sample: NS-B(7)  
Spectrum No : 8847

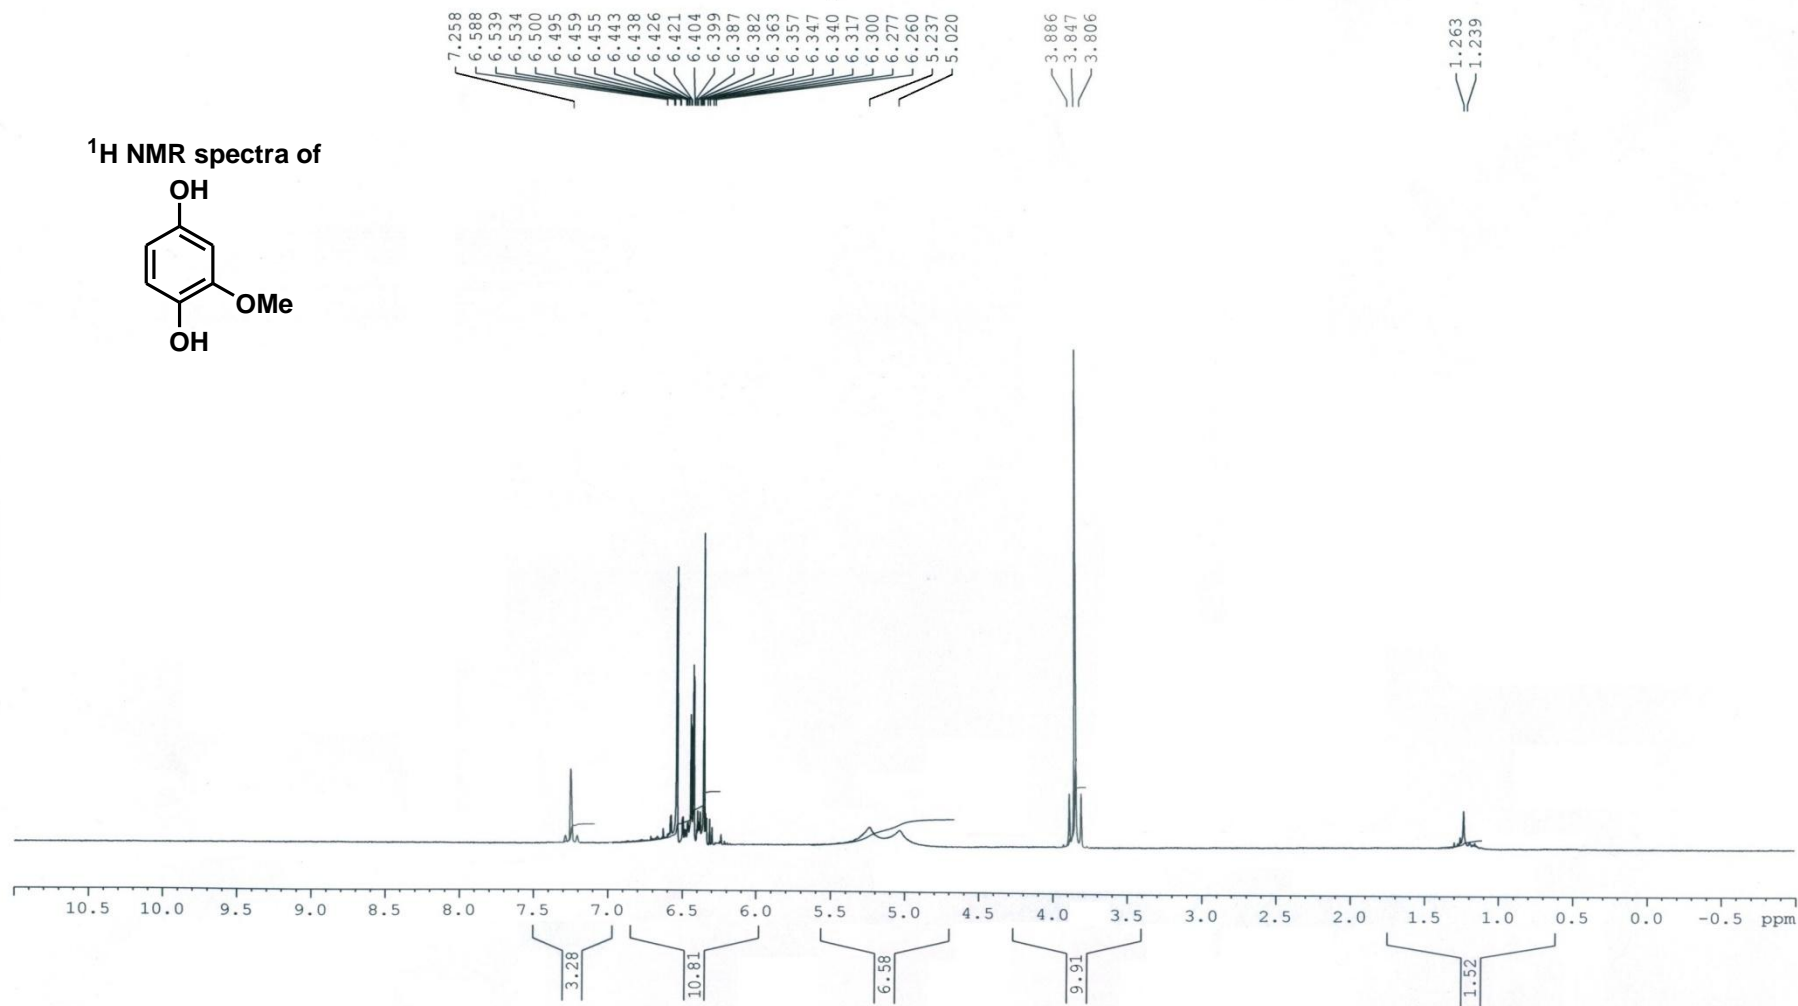



Name of Sample: NS-B(7)  
Spectrum No : 8848

<sup>13</sup>C NMR spectra of

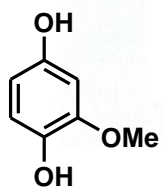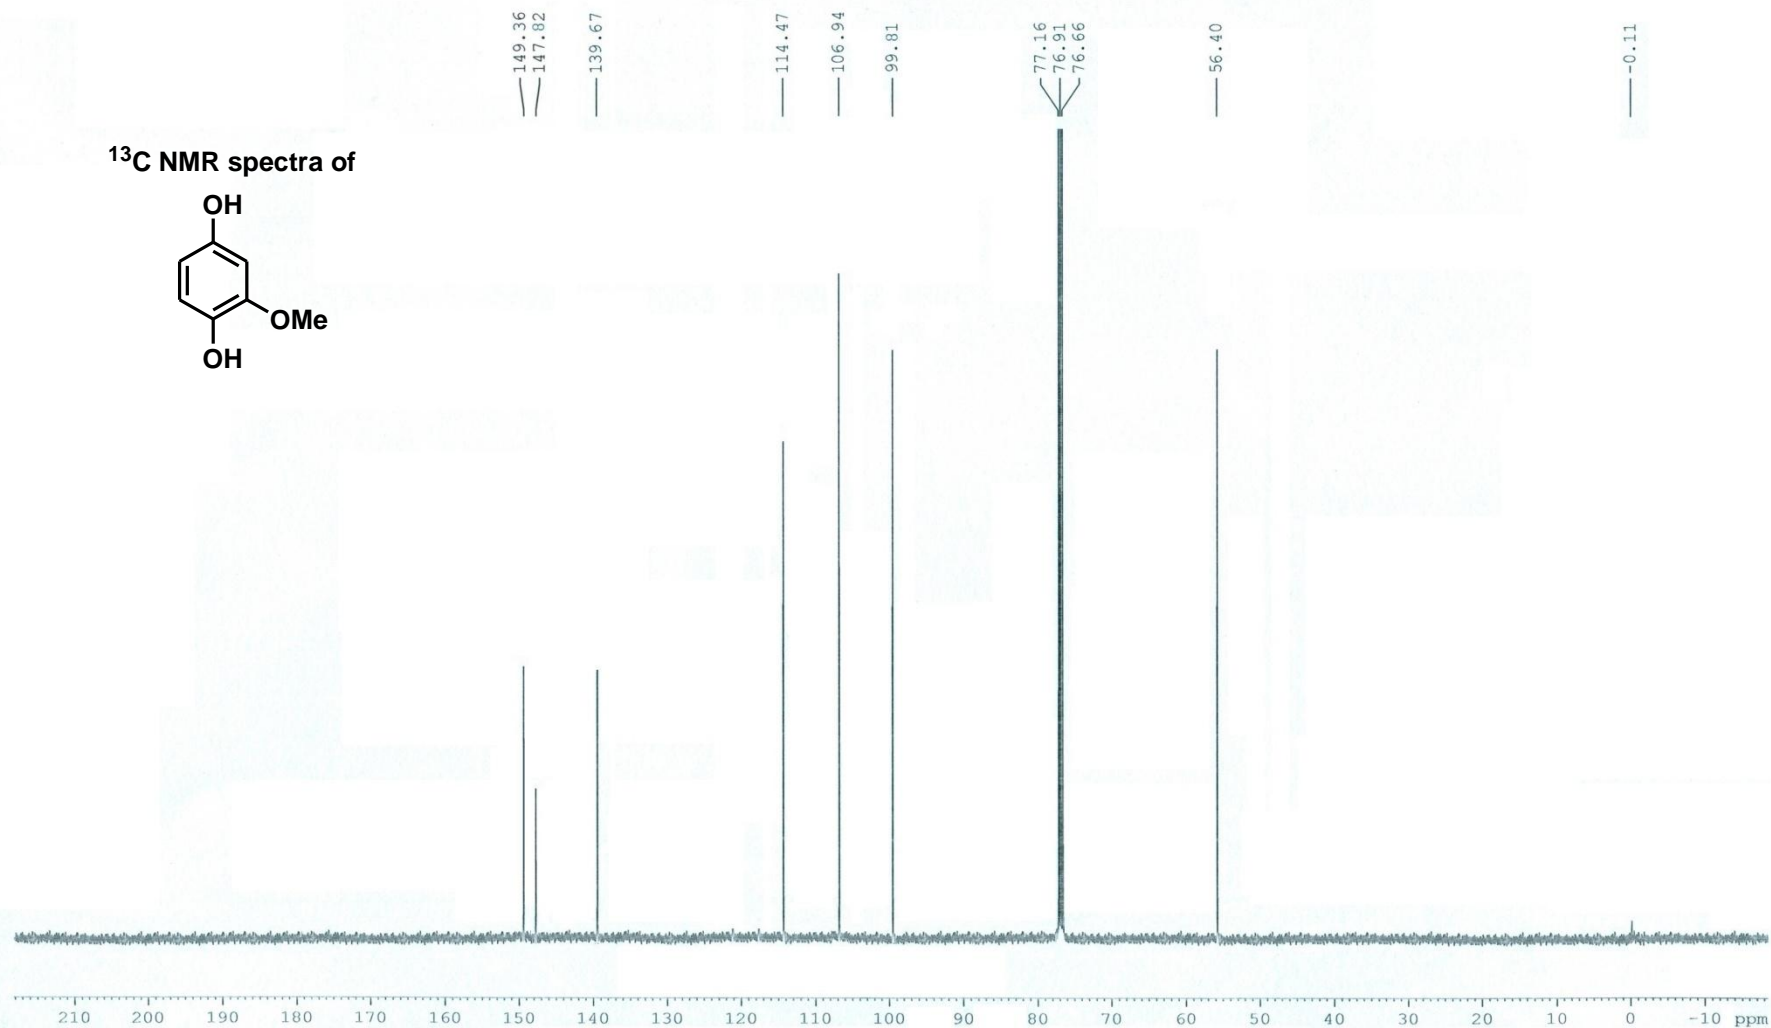

<sup>1</sup>H NMR spectra of

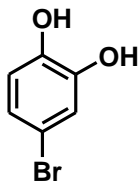

Name of Sample: NS-B(8)  
Spectrum No : 8865

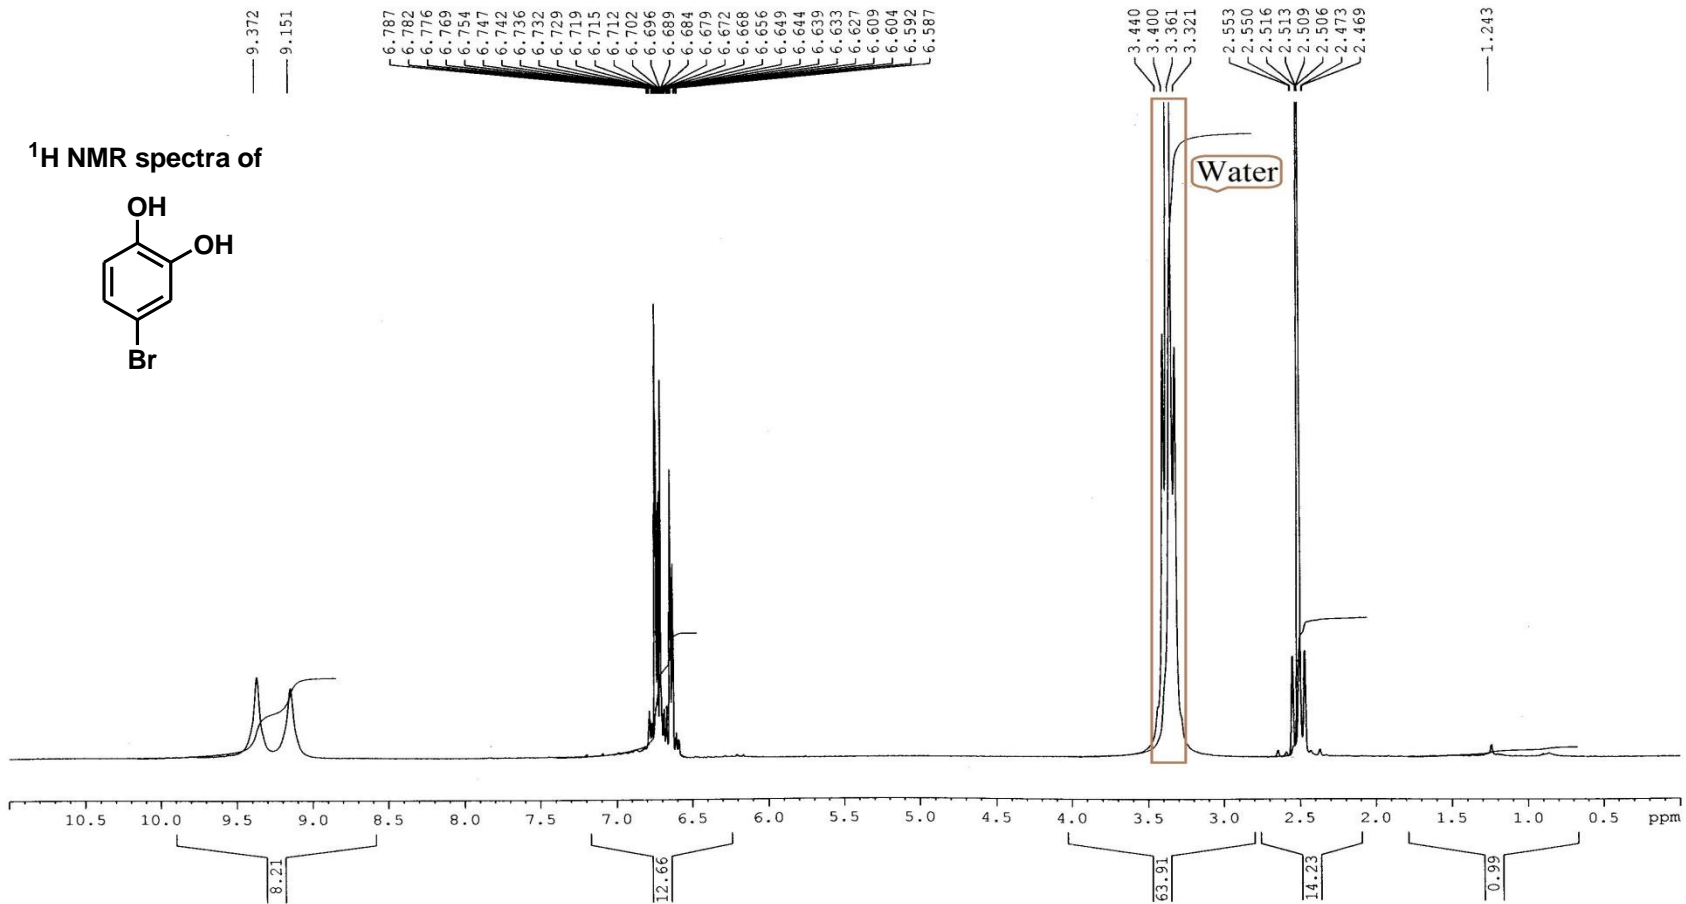

Name of Sample: NS-B(8)  
Spectrum No : 8868

<sup>13</sup>C NMR spectra of

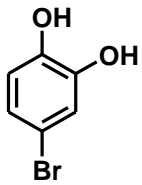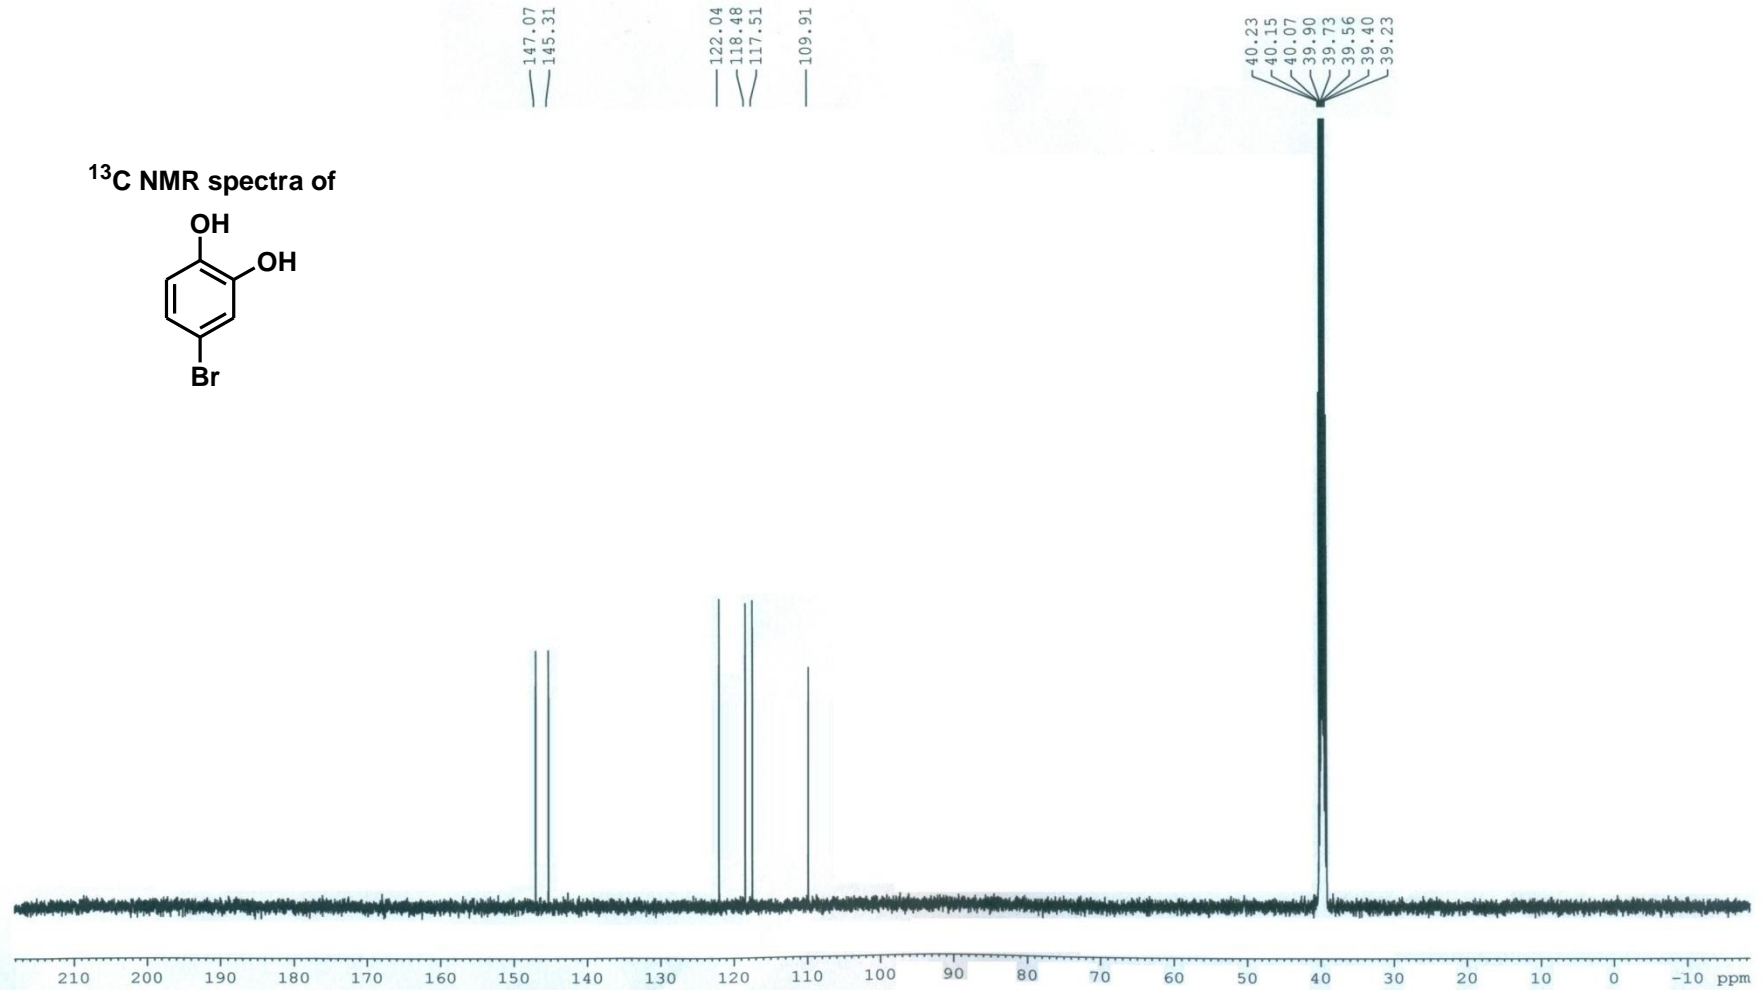

<sup>1</sup>H NMR spectra of

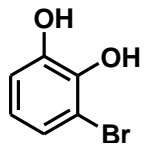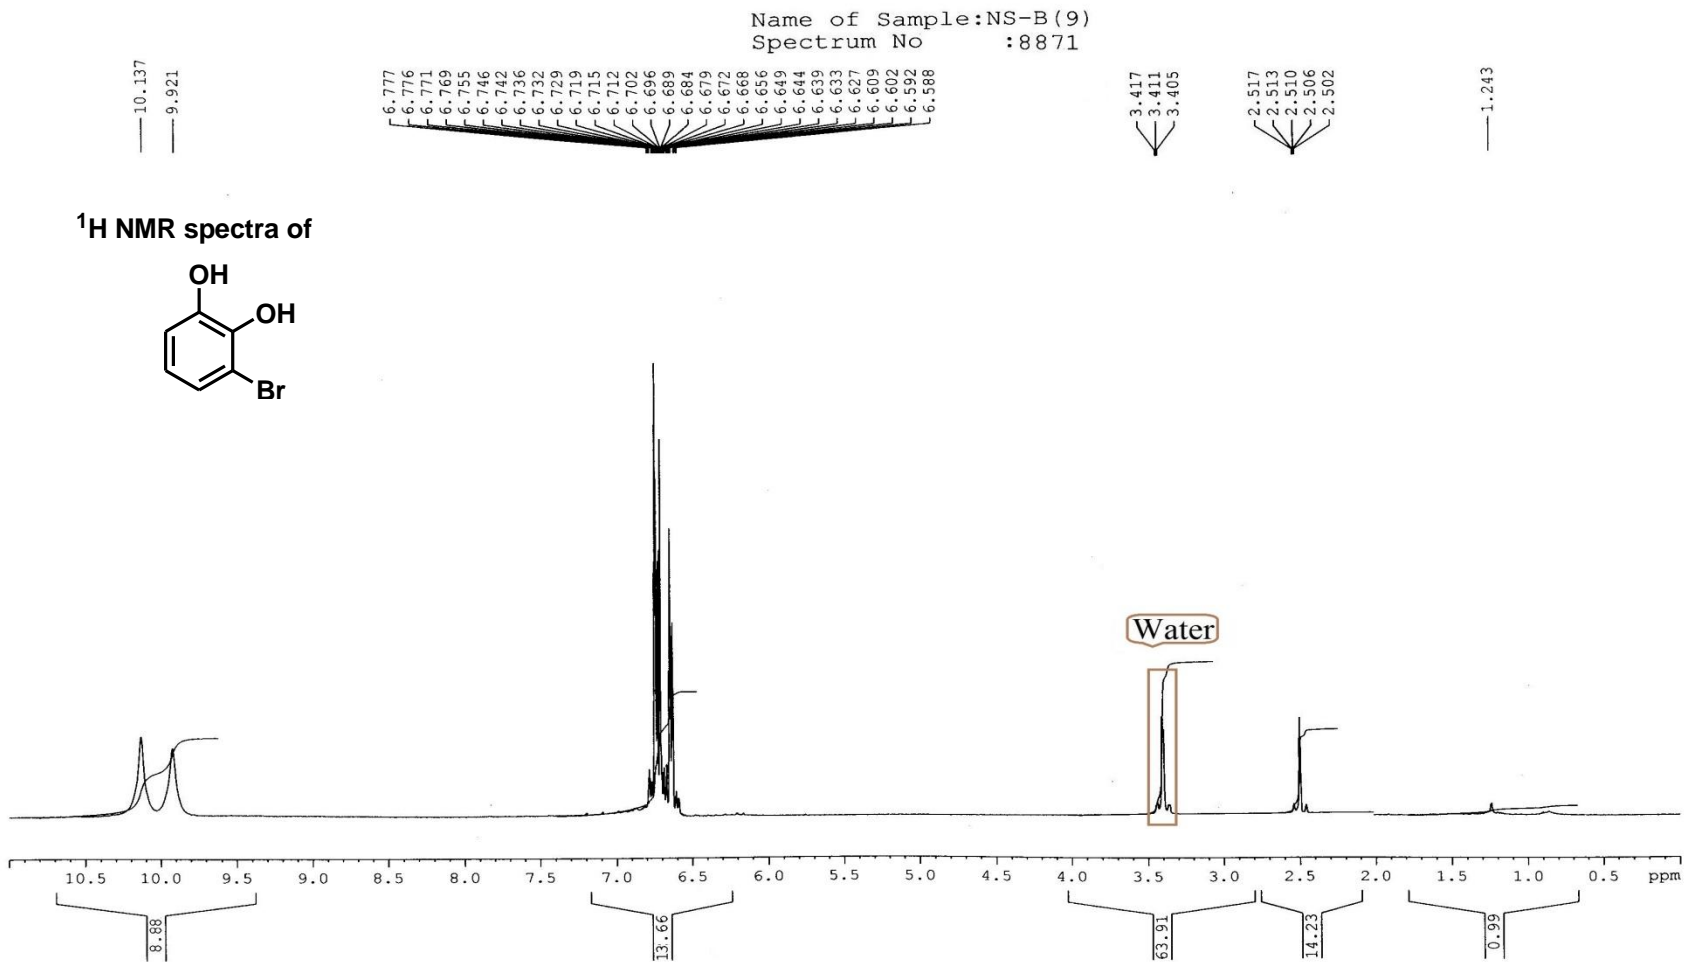

Name of Sample: NS-B(9)  
Spectrum No : 8878

<sup>13</sup>C NMR spectra of

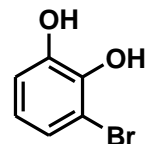

147.88  
146.61

125.84  
124.71

116.91  
111.84

40.23  
40.15  
40.07  
39.90  
39.73  
39.56  
39.40  
39.23

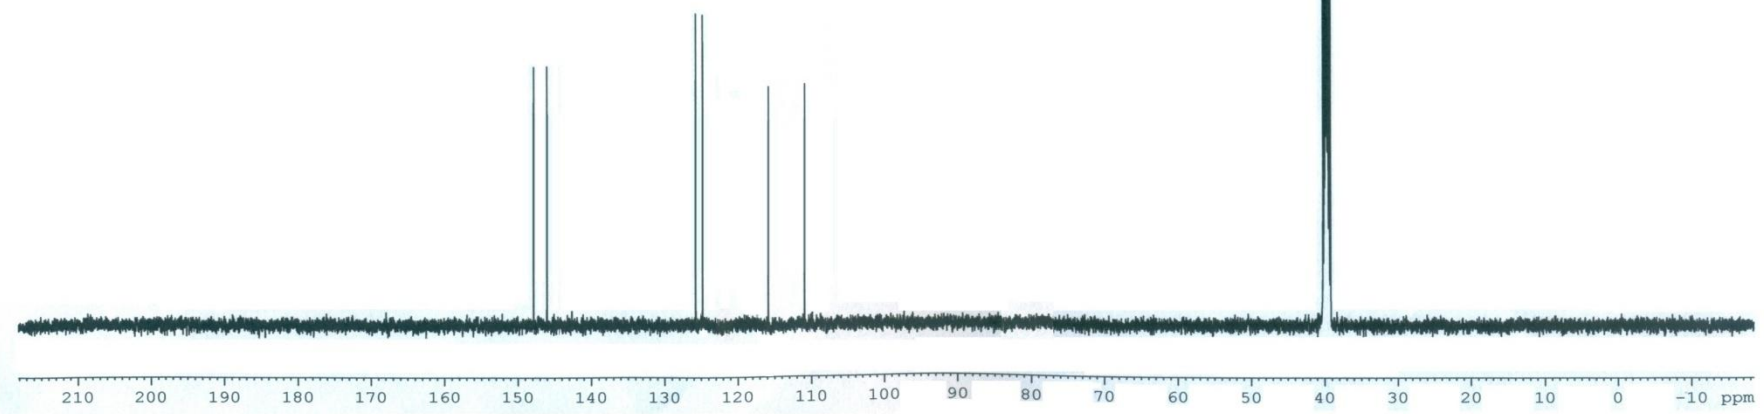

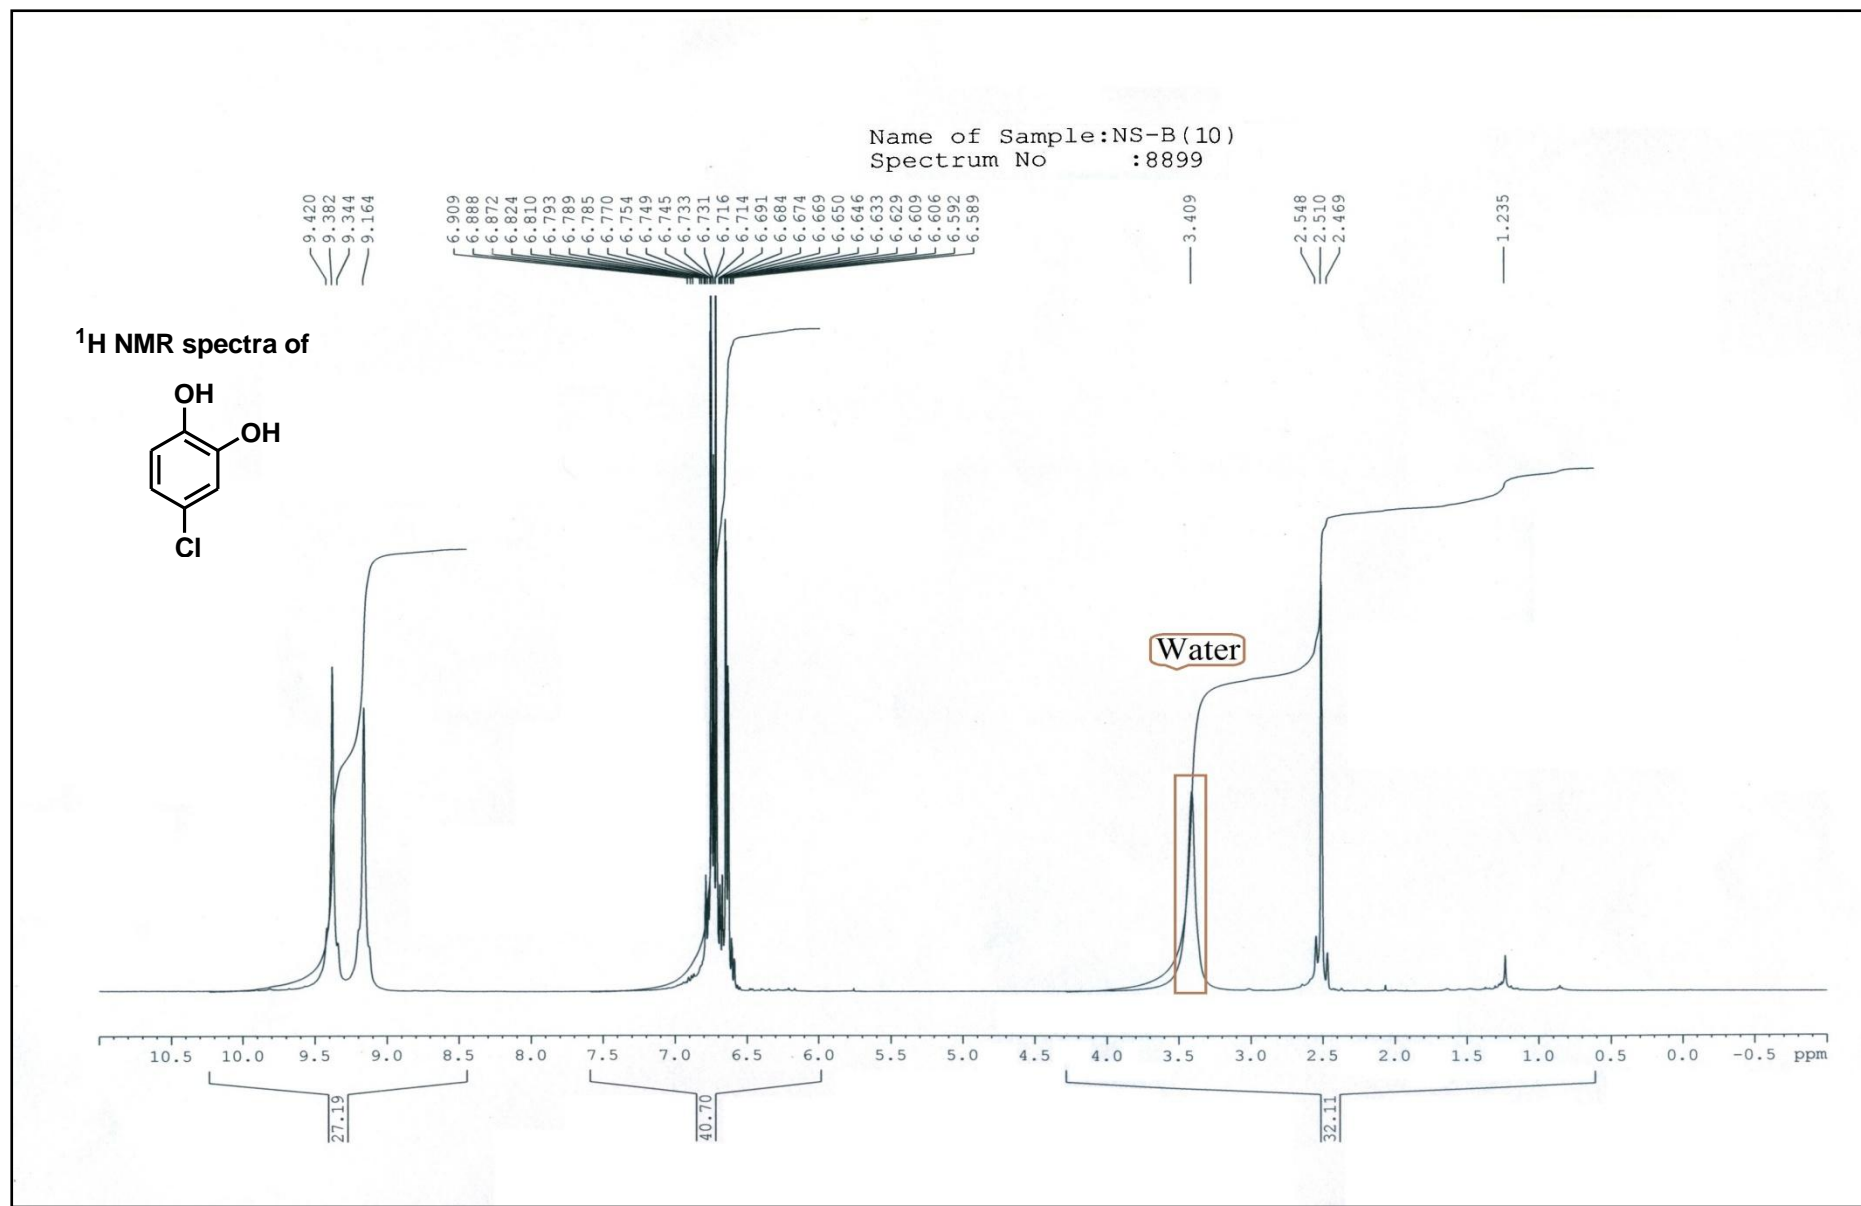

Name of Sample: NS-B(10)

Spectrum No : 8910

<sup>13</sup>C NMR spectra of

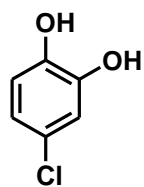

146.73  
144.86

122.46  
119.06  
116.88  
115.75

40.28  
40.12  
40.04  
39.95  
39.78  
39.62  
39.45  
39.28

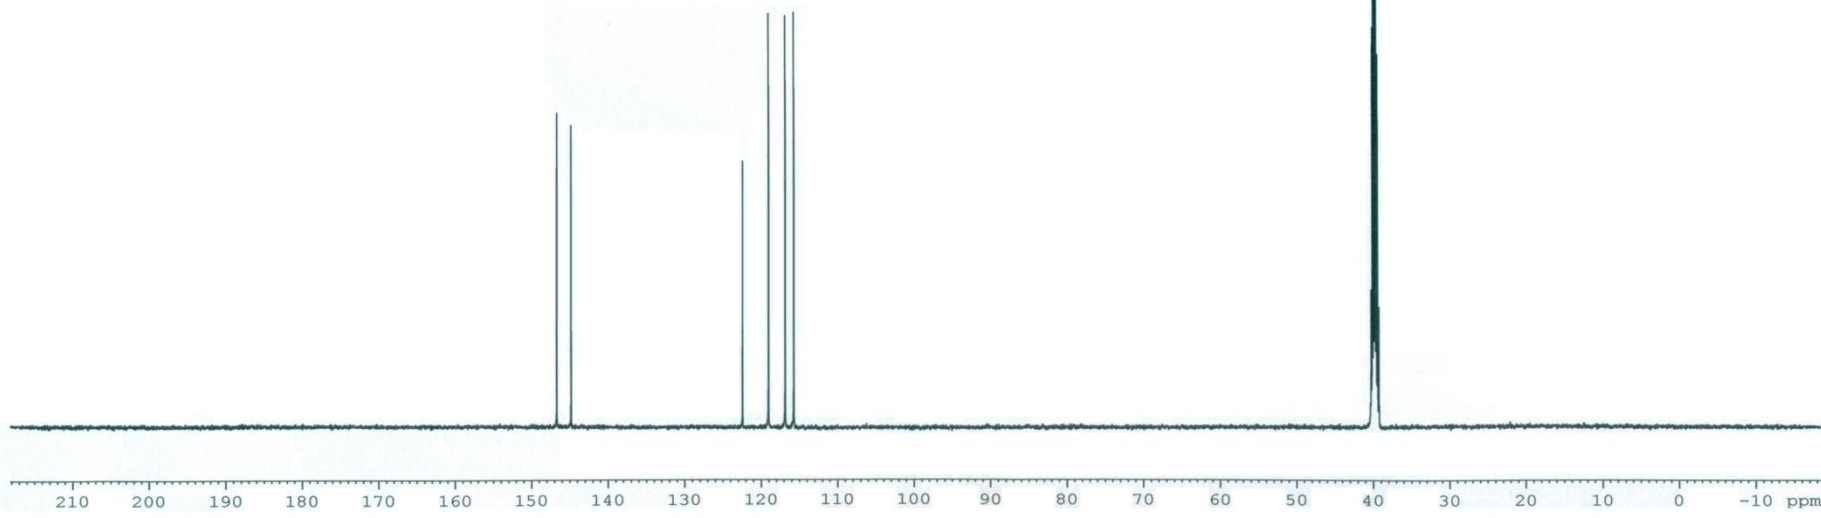

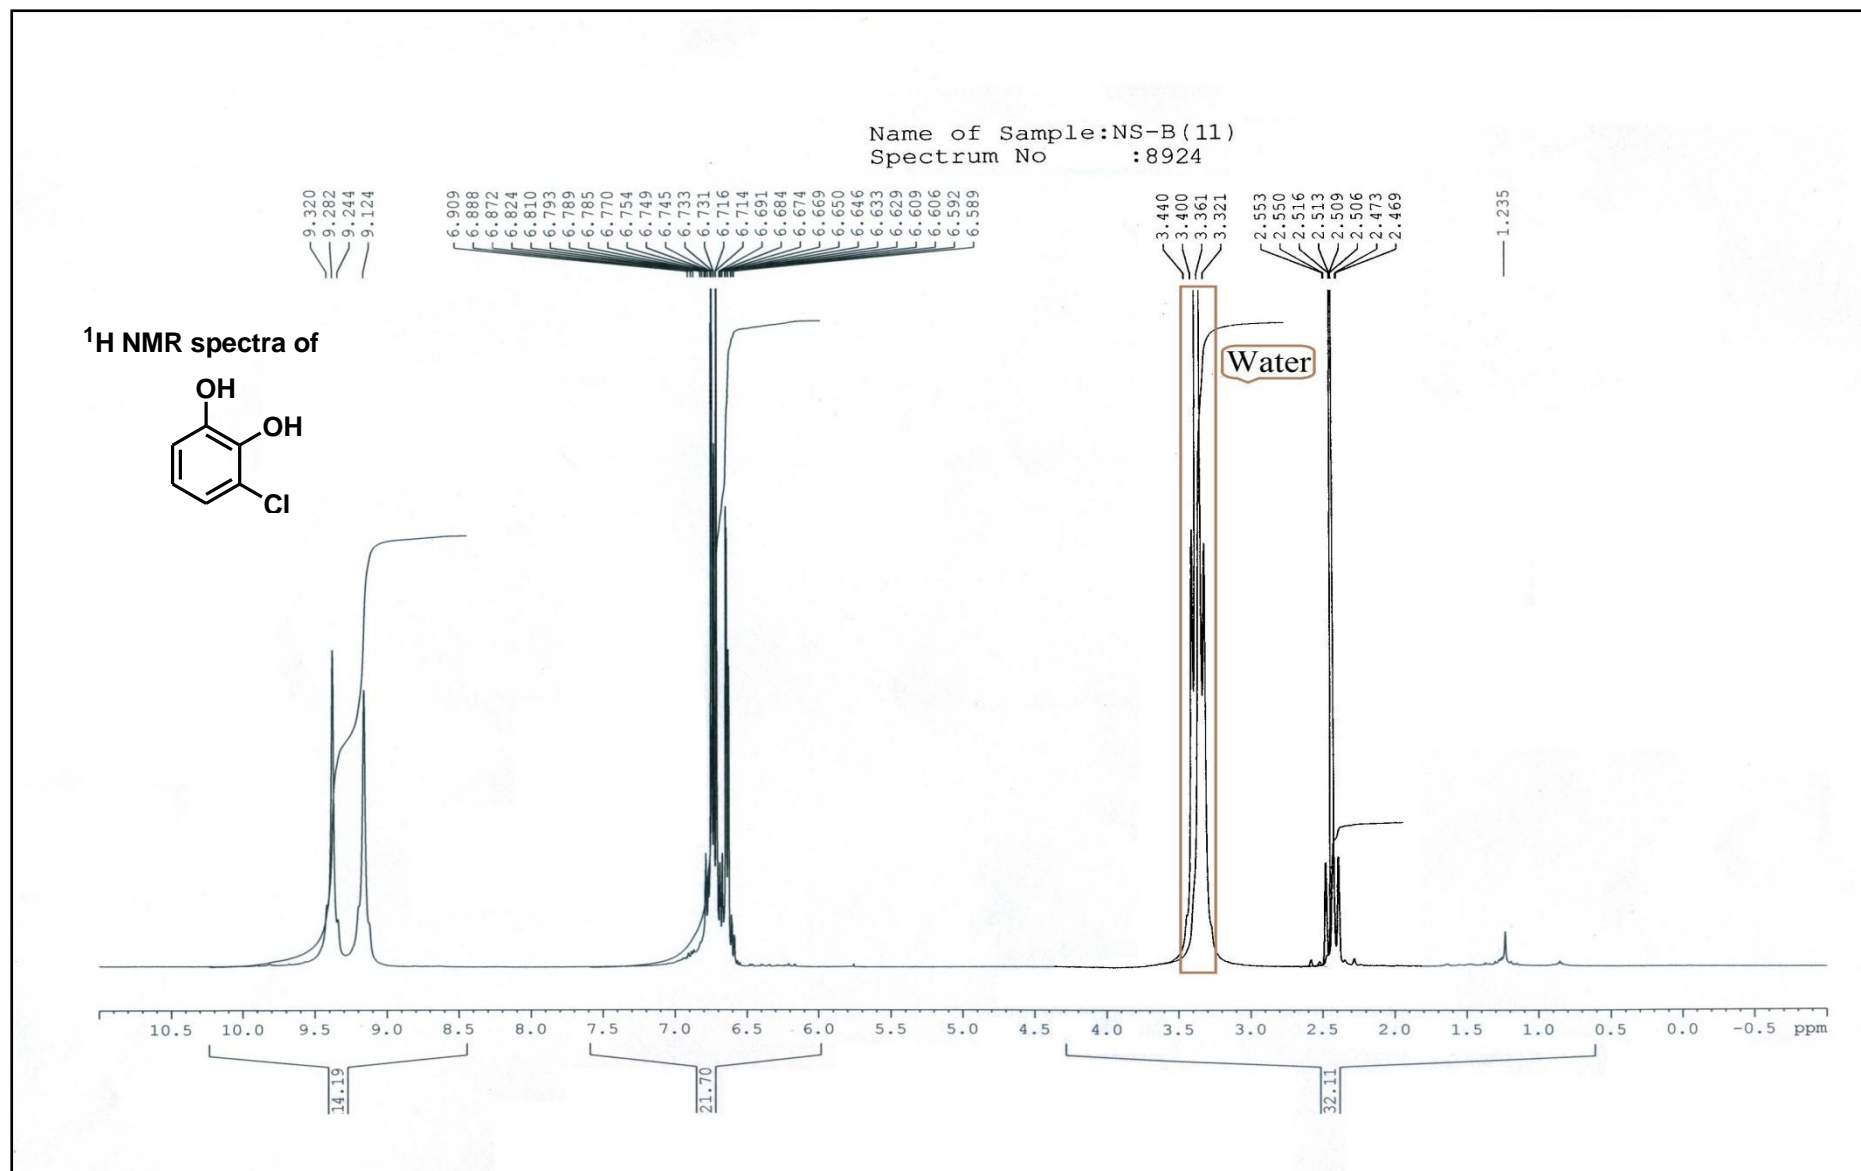



Name of Sample: NS-B(11)

Spectrum No : 8929

<sup>13</sup>C NMR spectra of

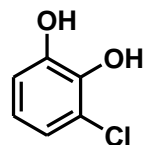

145.73  
144.16

123.96  
122.96  
122.48  
115.25

40.28  
40.12  
40.04  
39.95  
39.78  
39.62  
39.45  
39.28

210 200 190 180 170 160 150 140 130 120 110 100 90 80 70 60 50 40 30 20 10 0 -10 ppm

Name of Sample: NS-B(12)  
Spectrum No.: 8943

<sup>1</sup>H NMR spectra of

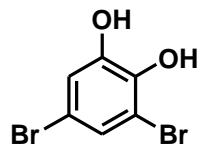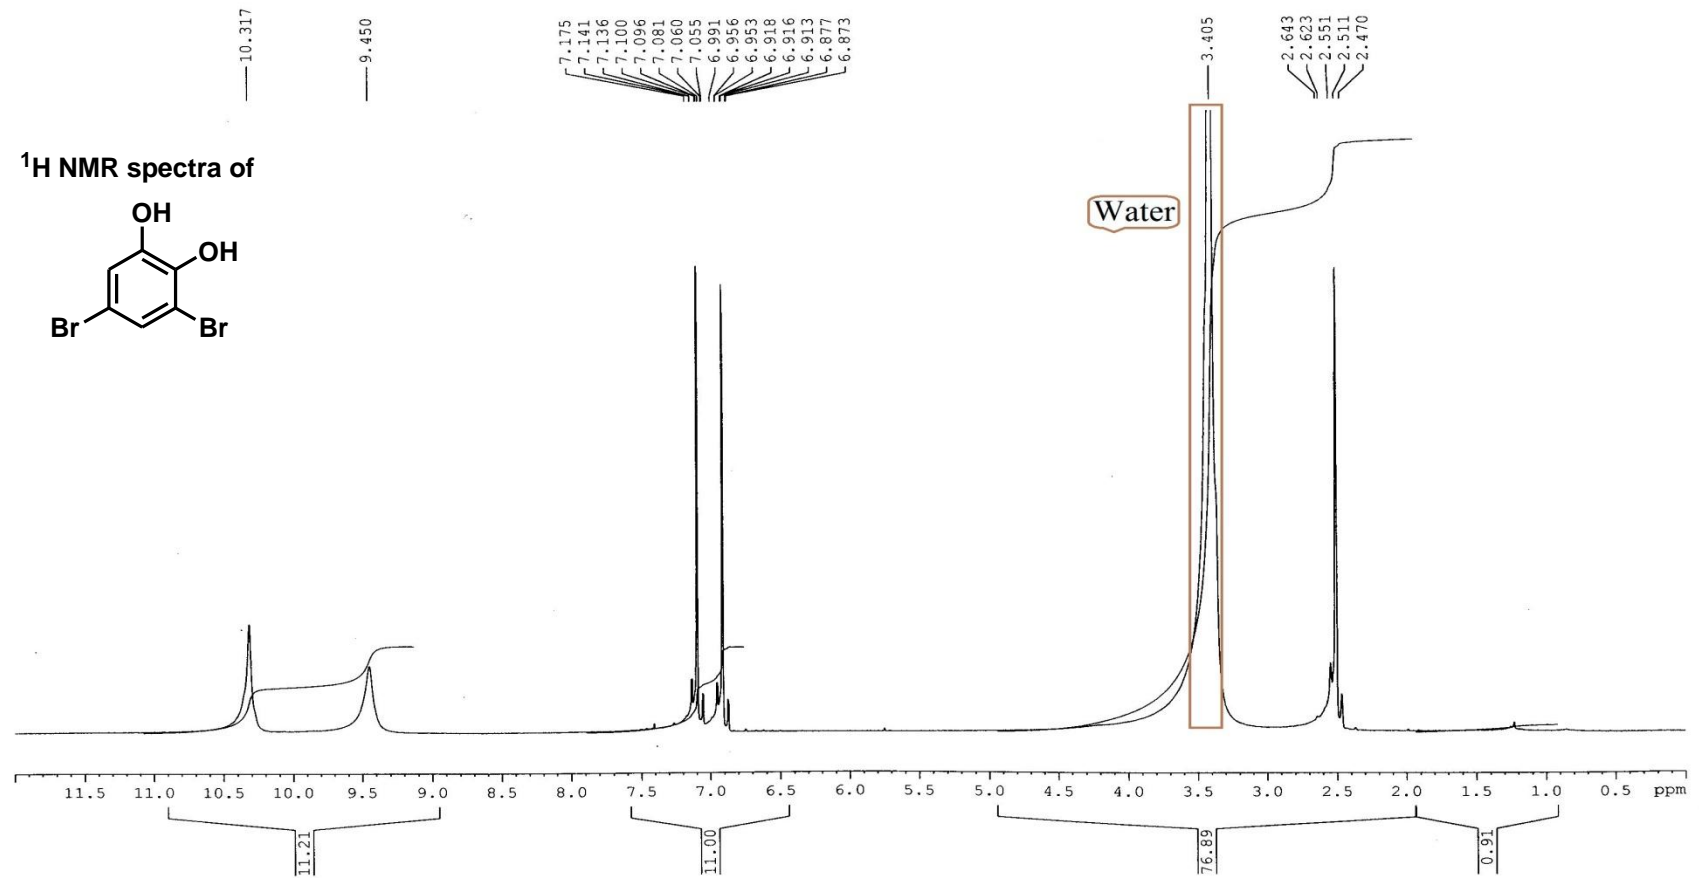

Name of Sample: NS-B(12)  
Spectrum No.: 8948

<sup>13</sup>C NMR spectra of

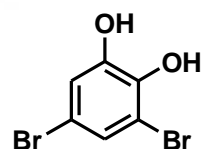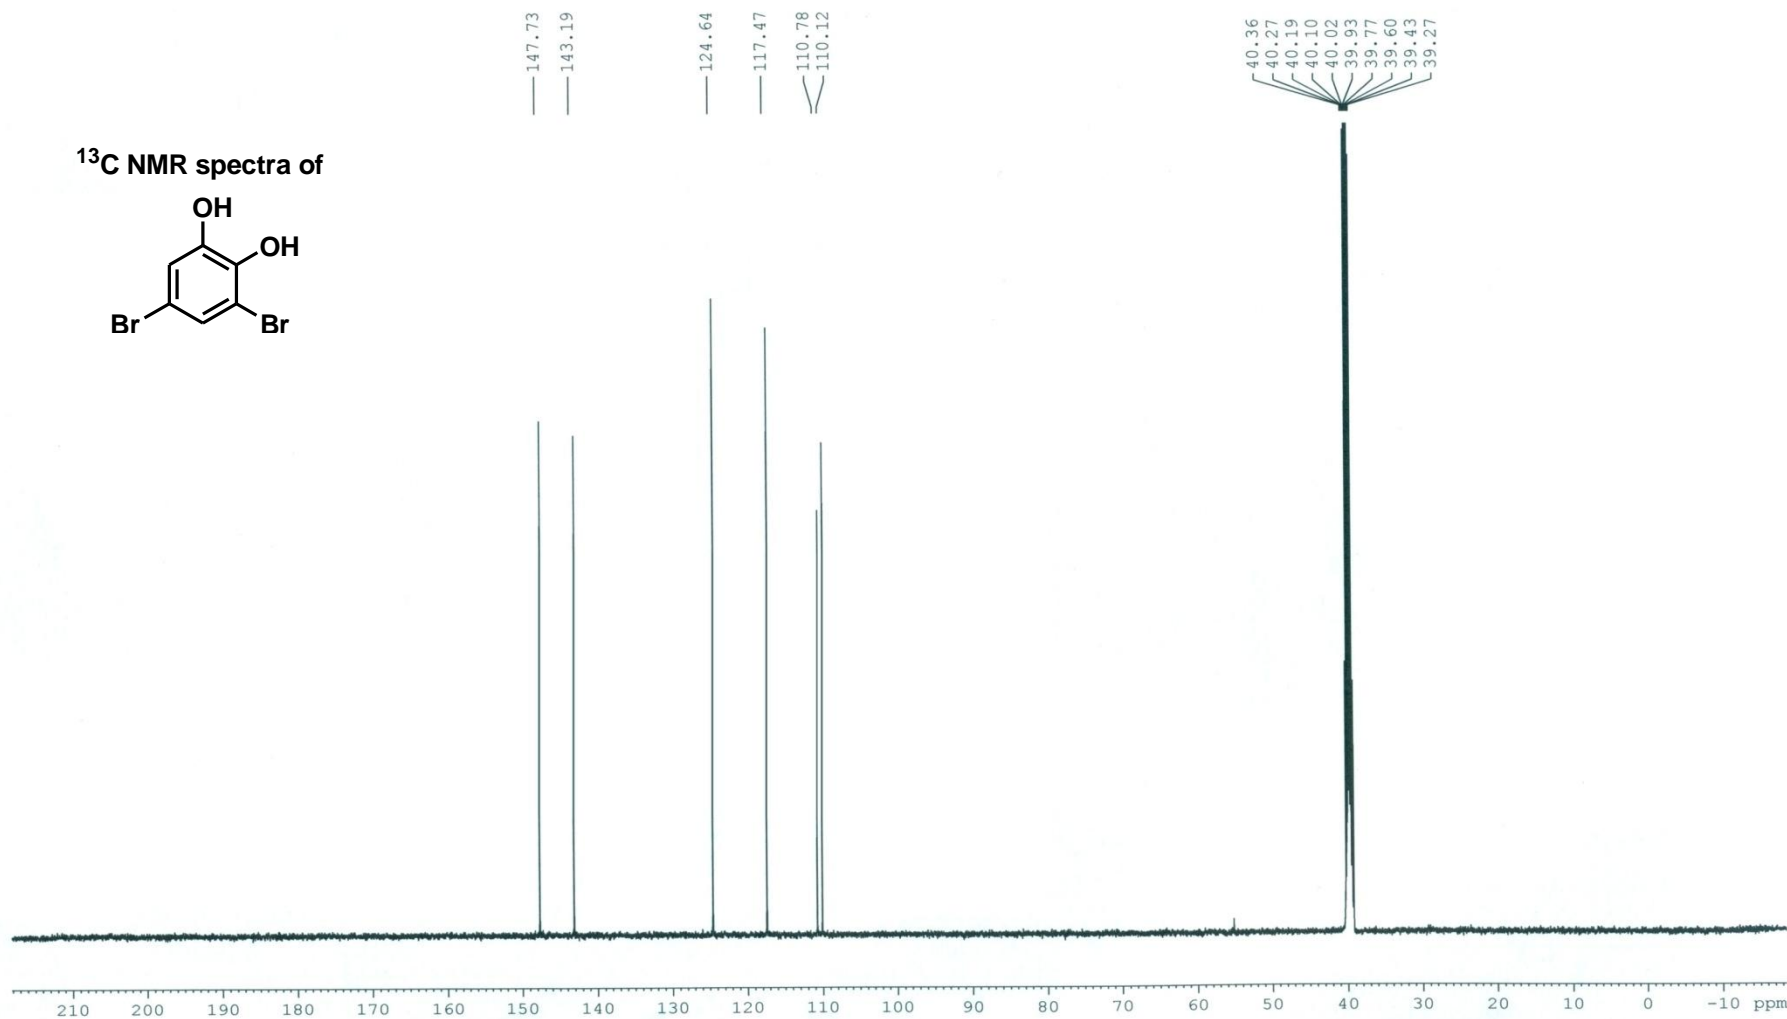

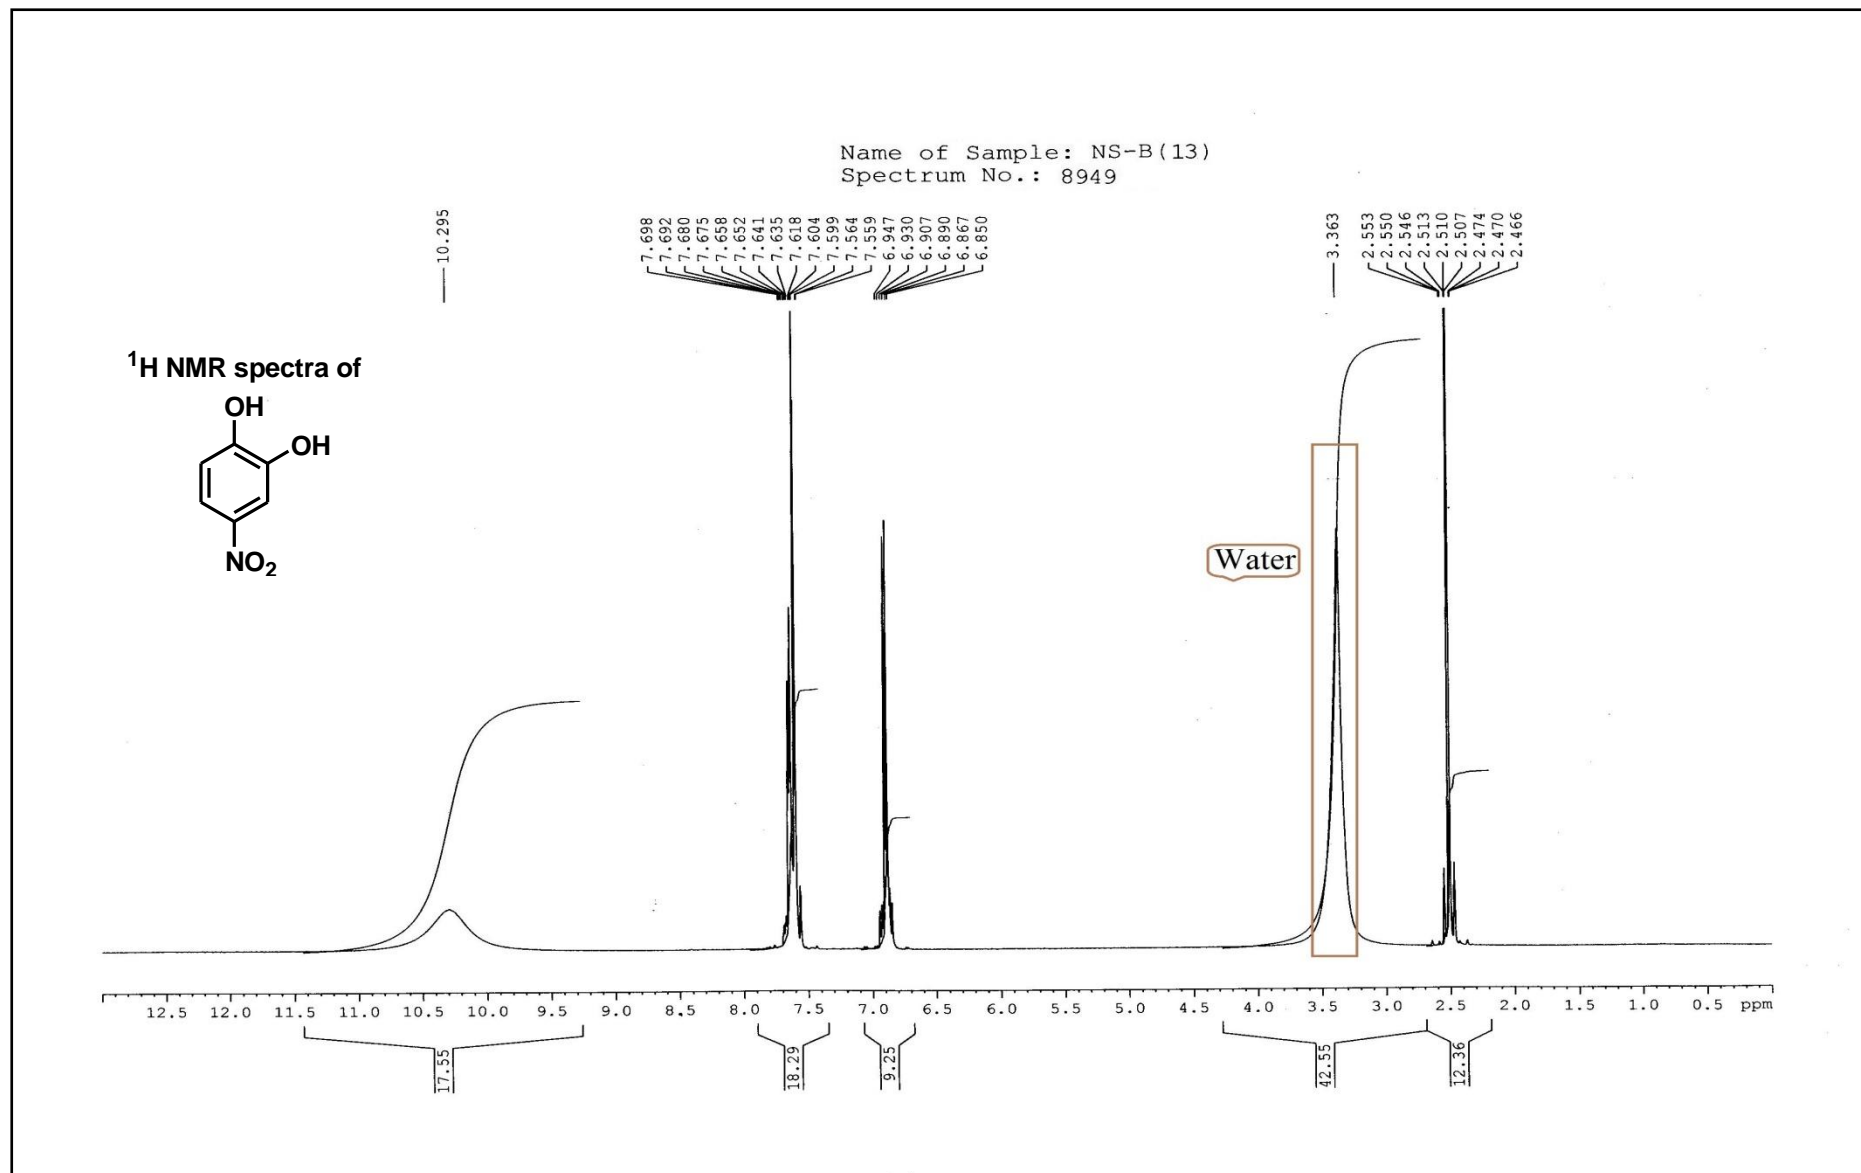

Name of Sample: NS-B(13)  
Spectrum No.: 8963

<sup>13</sup>C NMR spectra of

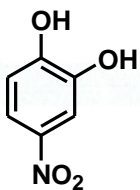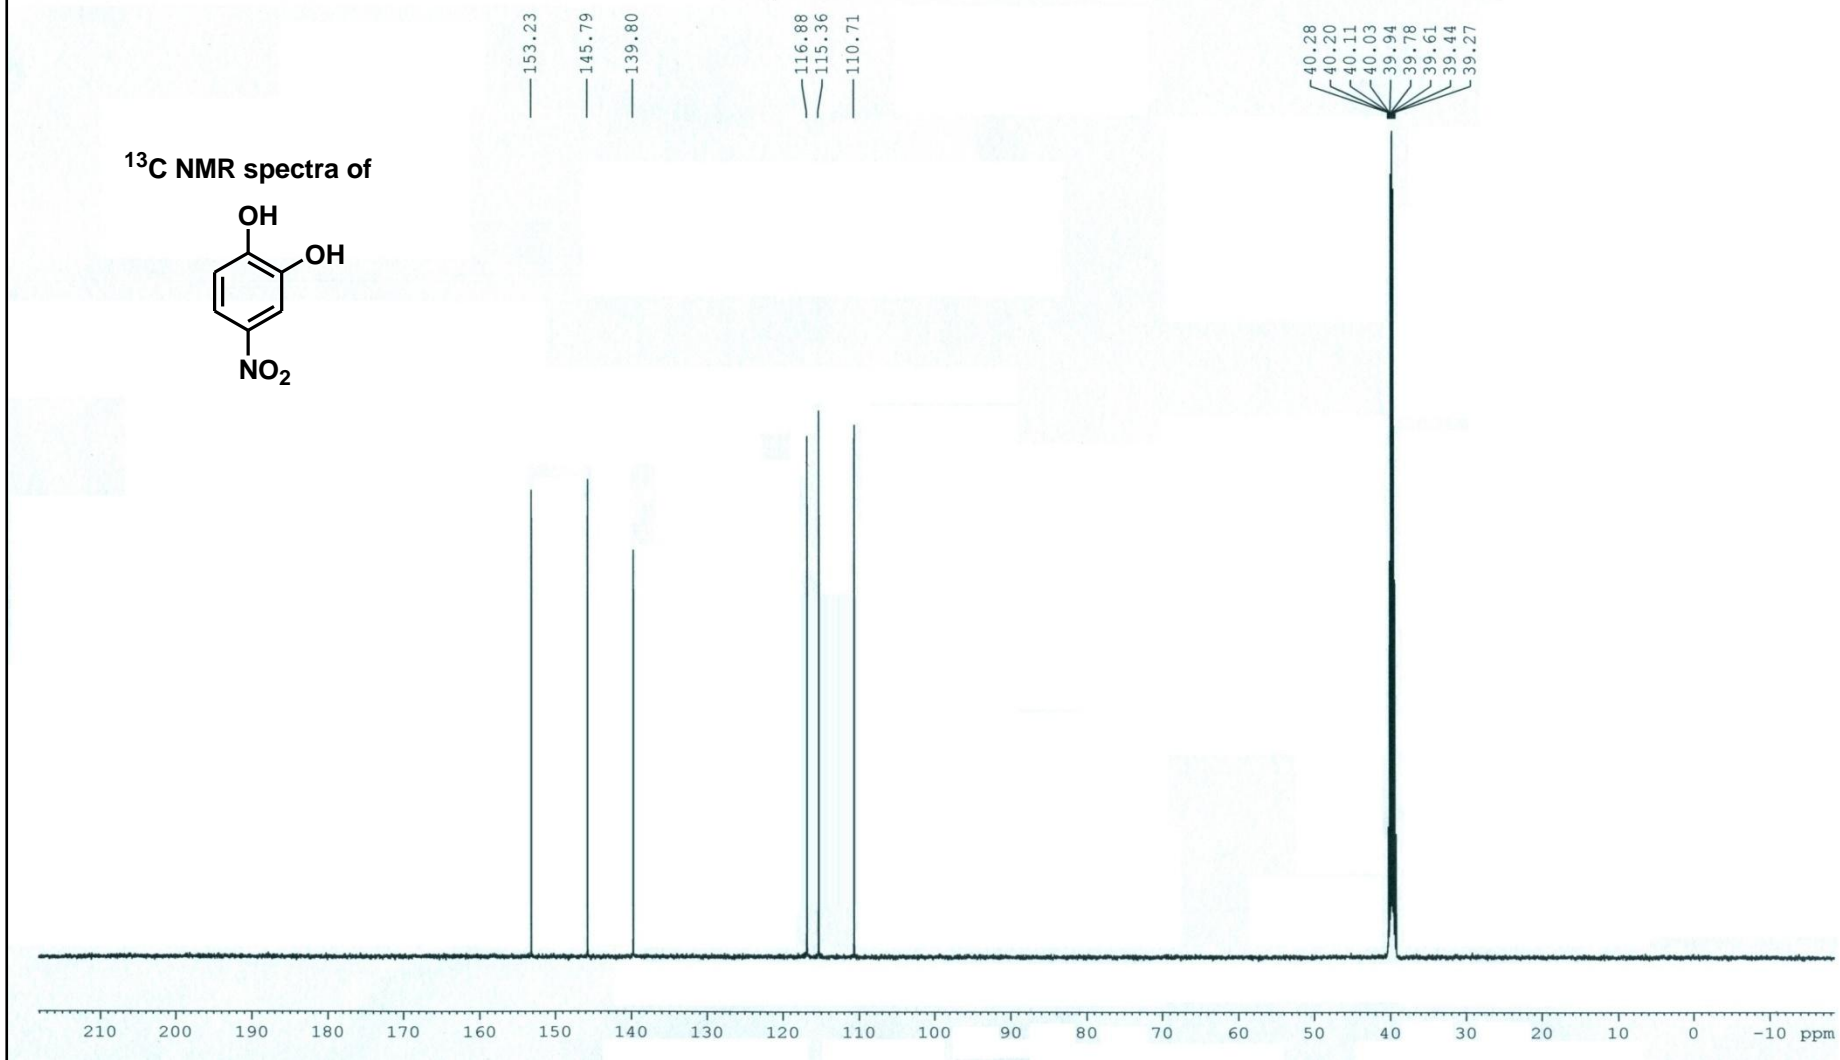

<sup>1</sup>H NMR spectra of

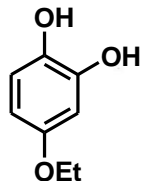

Name of Sample: NS-B(14)  
Spectrum No.: 8974

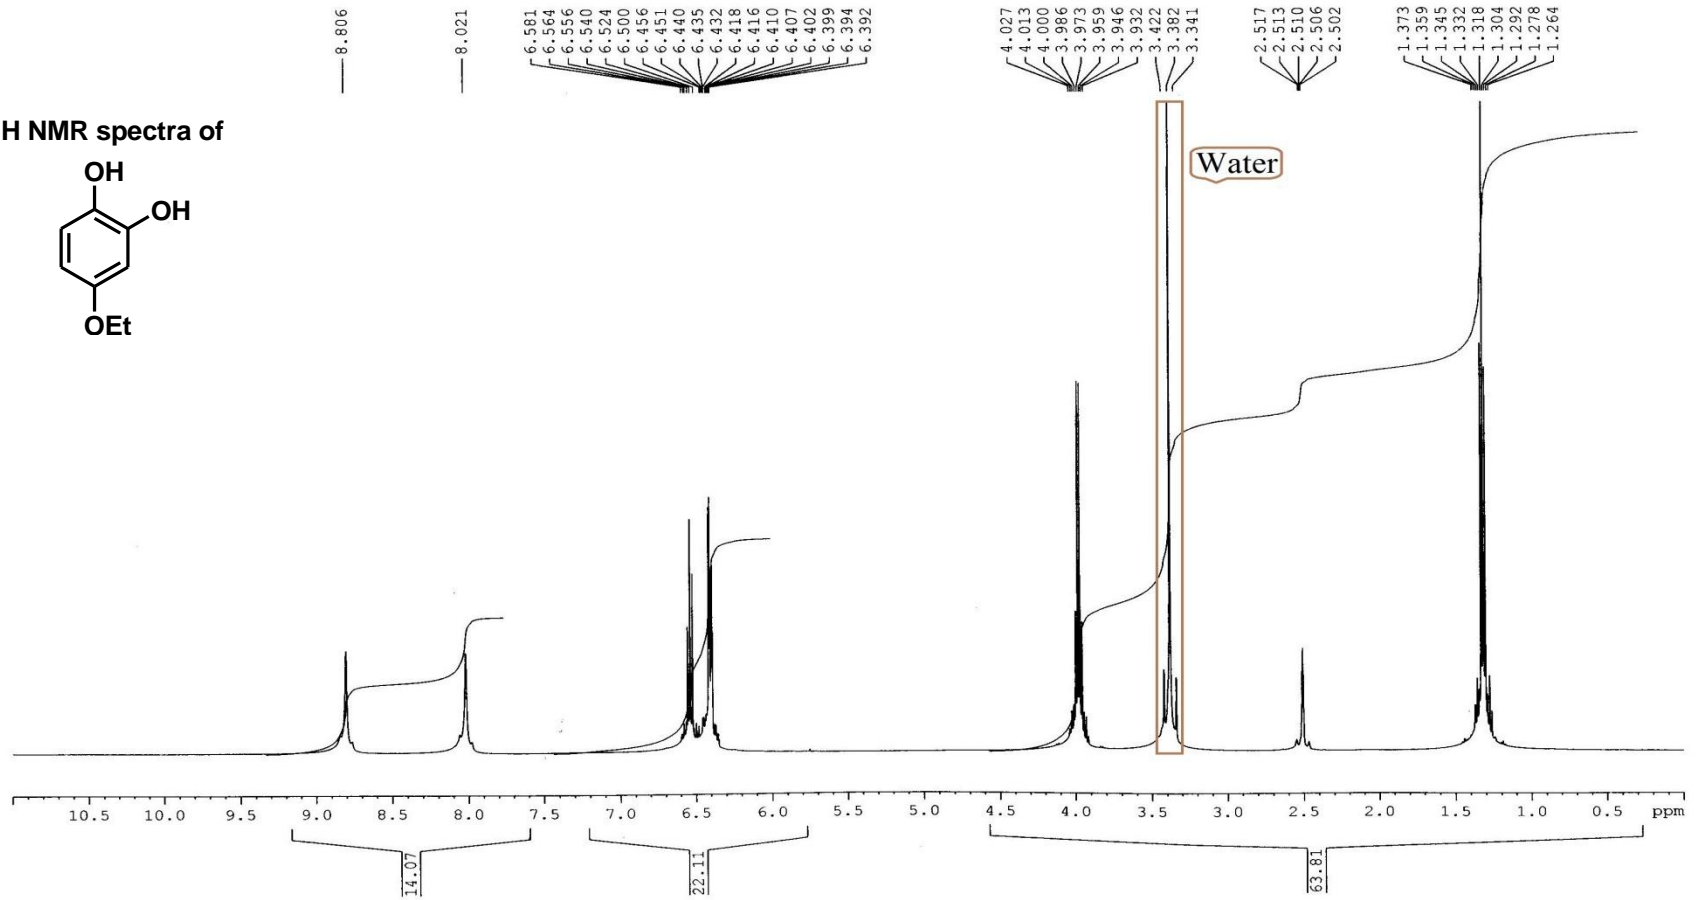

Name of Sample: NS-B(14)  
Spectrum No.: 8986

<sup>13</sup>C NMR spectra of

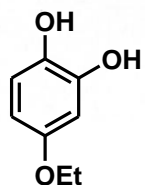

147.96  
146.32

134.88

118.63

109.30

105.25

64.34

40.36  
40.27  
40.19  
40.10  
40.02  
39.93  
39.86  
39.77  
39.60  
39.43  
39.27

15.19

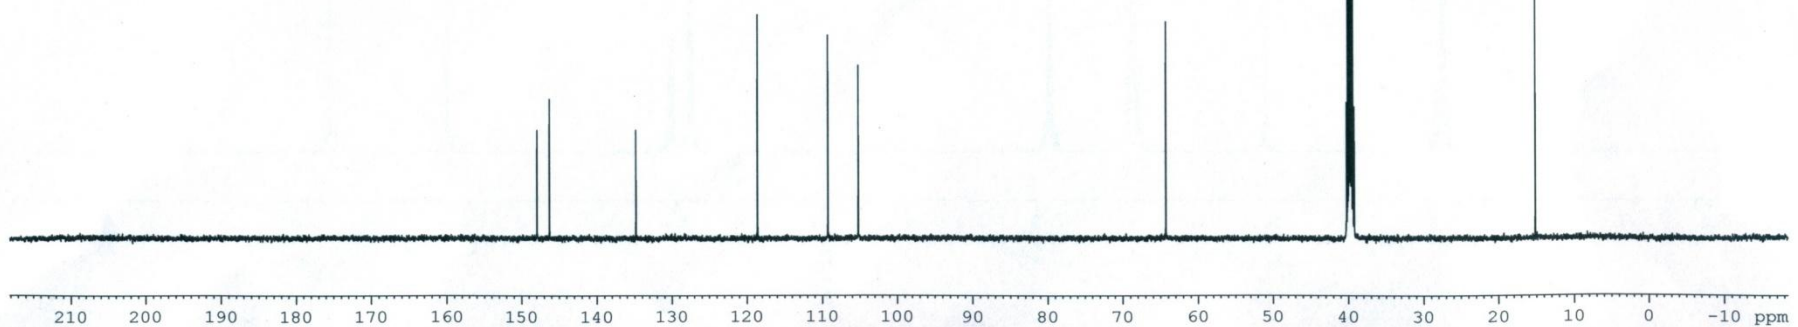

Name of Sample: NS-B(15)  
Spectrum No.: 8991

<sup>1</sup>H NMR spectra of

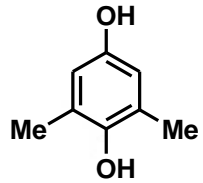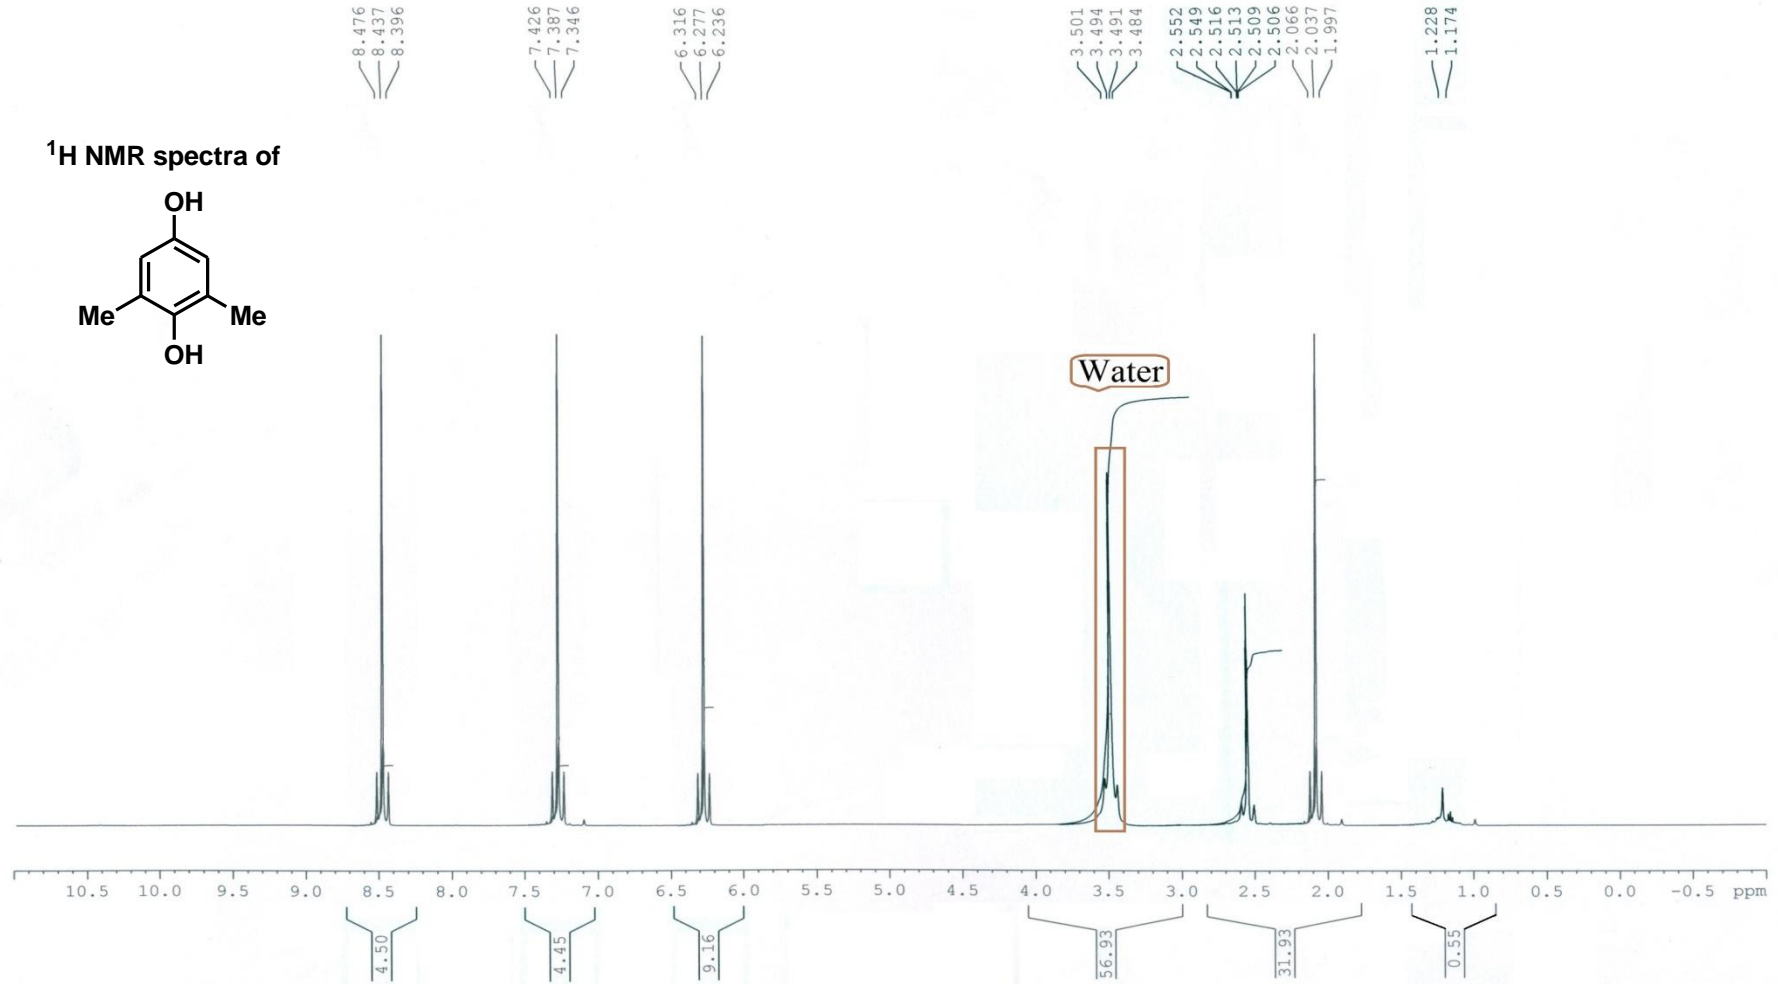



Name of Sample: NS-B(15)  
Spectrum No.: 9030

<sup>13</sup>C NMR spectra of

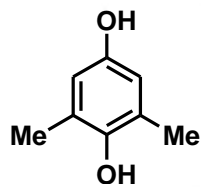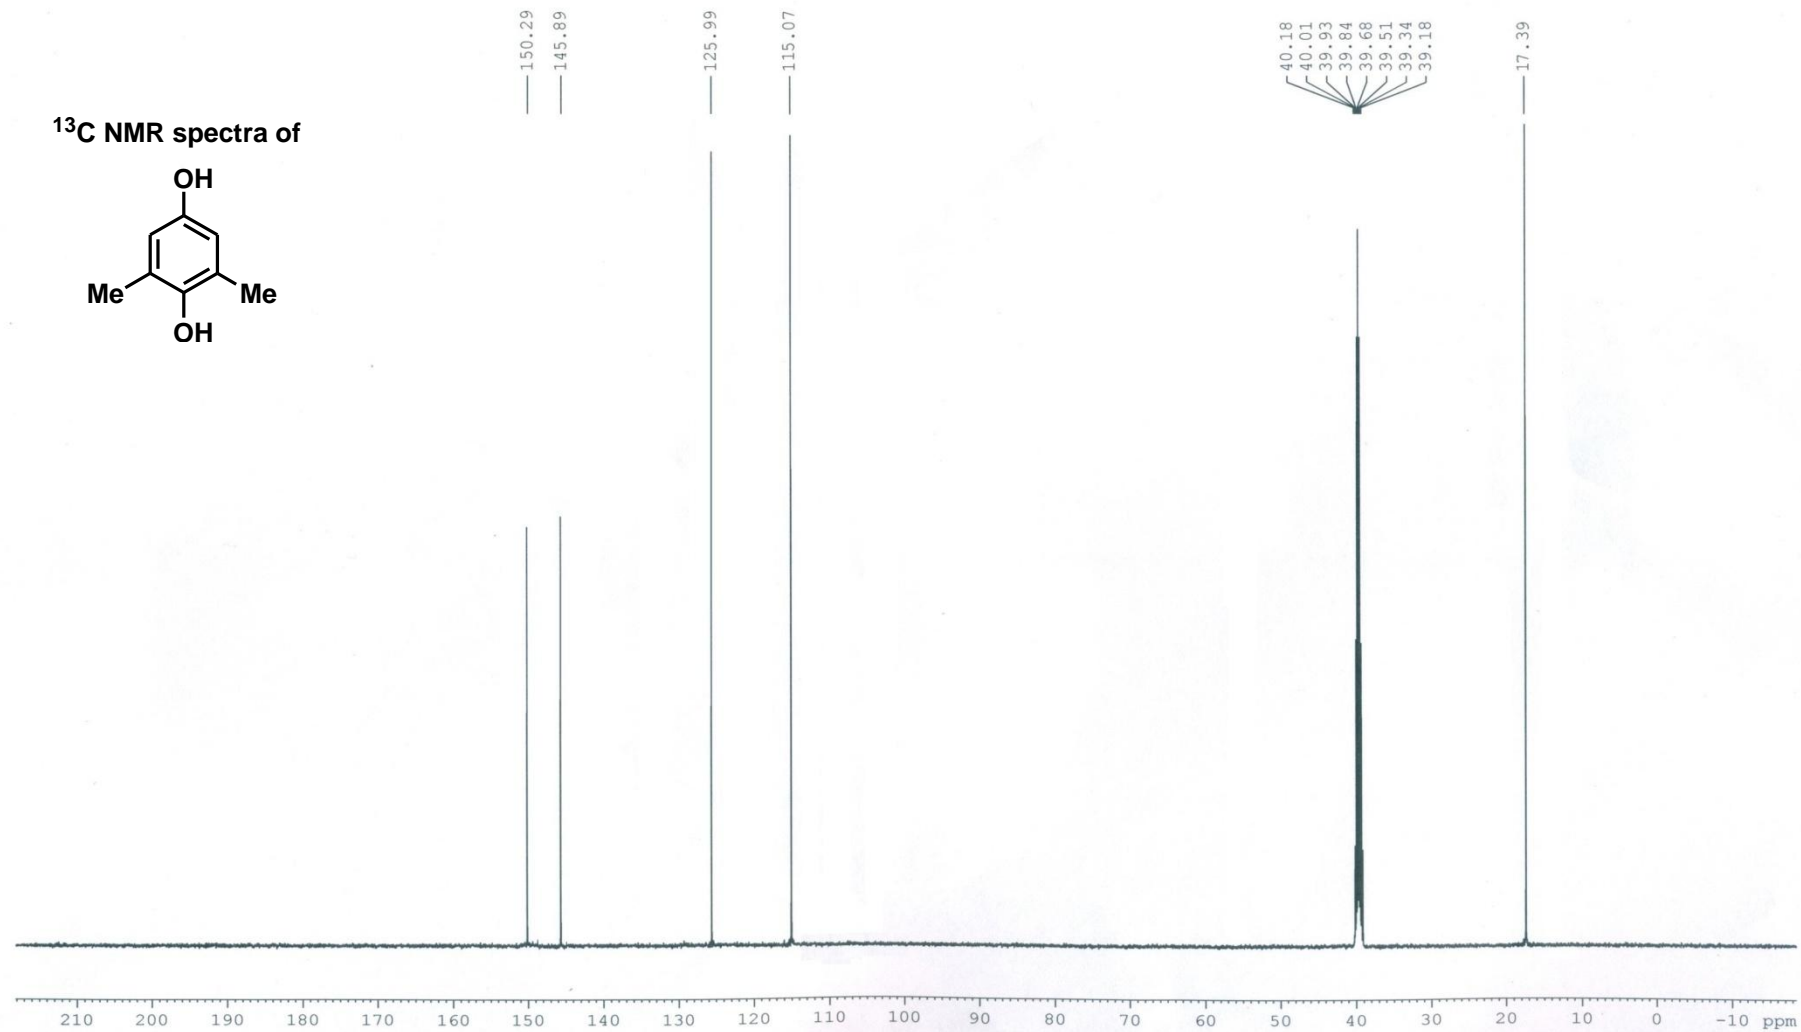

Name of Sample: NS-B(16)  
Spectrum No.: 9171

<sup>1</sup>H NMR spectra of

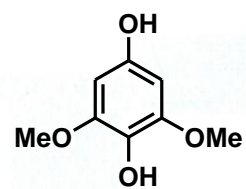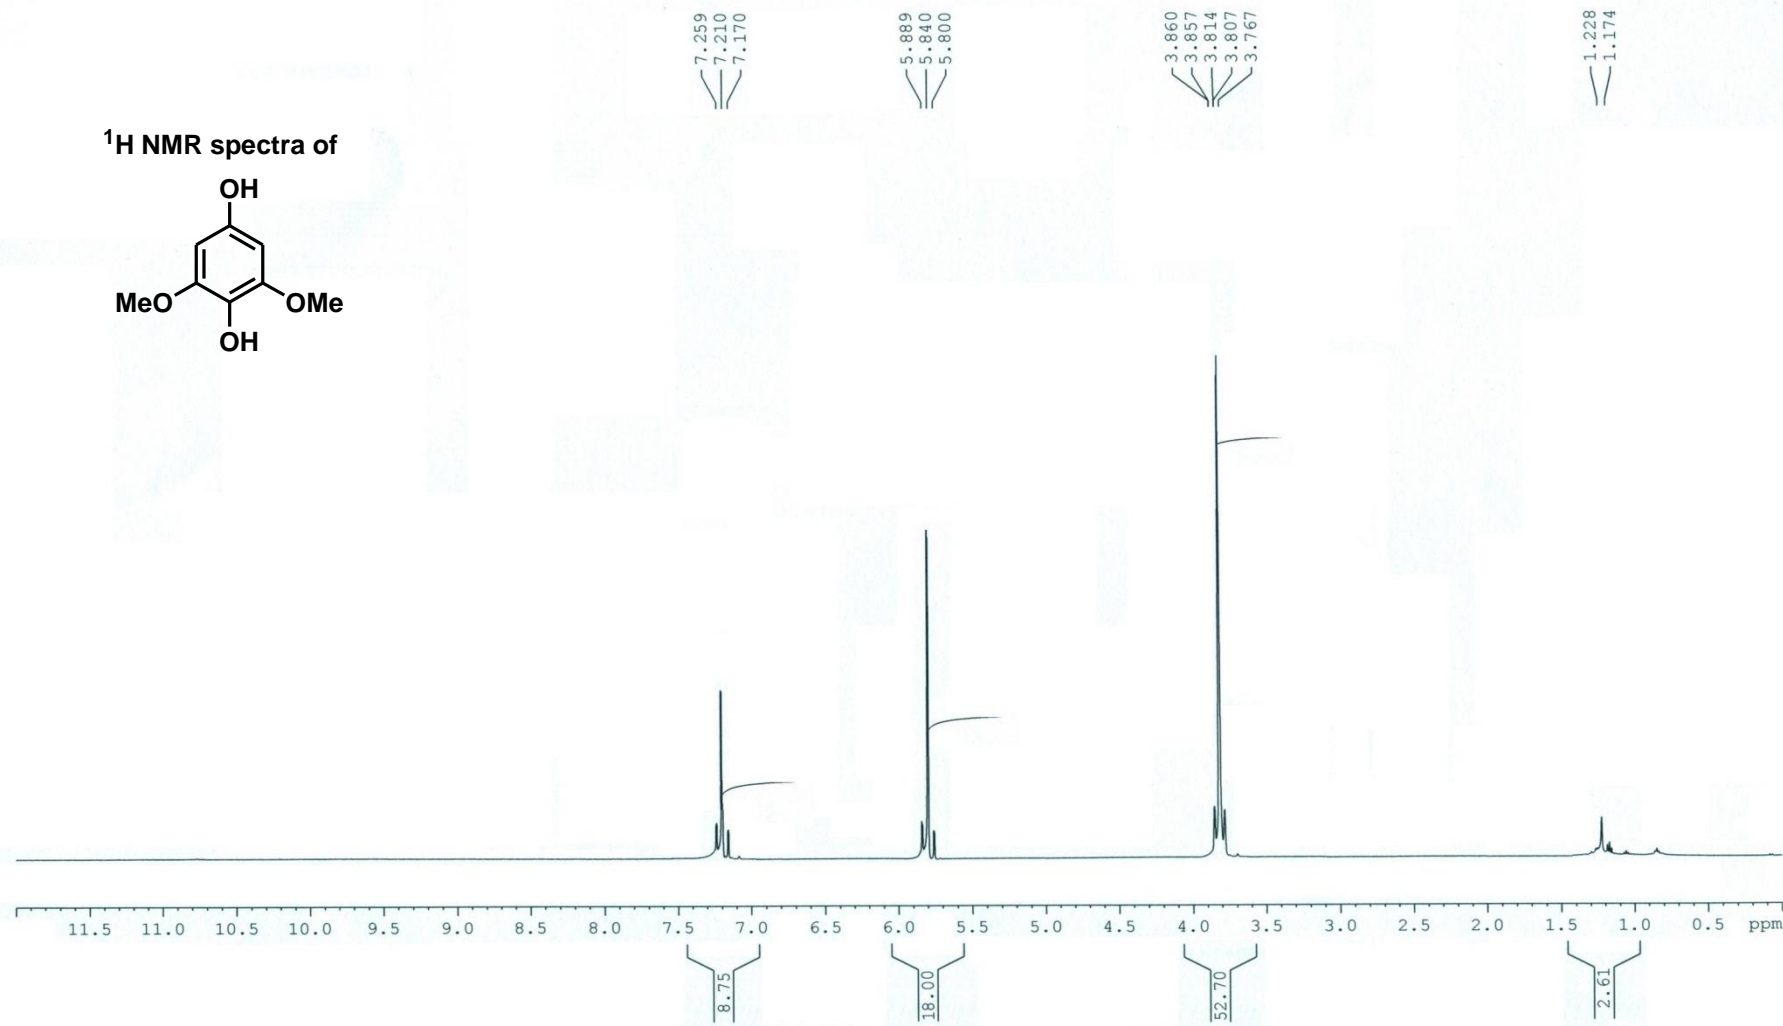

Name of Sample: NS-B(16)  
Spectrum No.: 9176

<sup>13</sup>C NMR spectra of

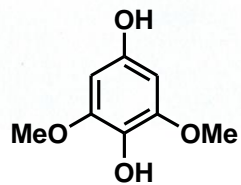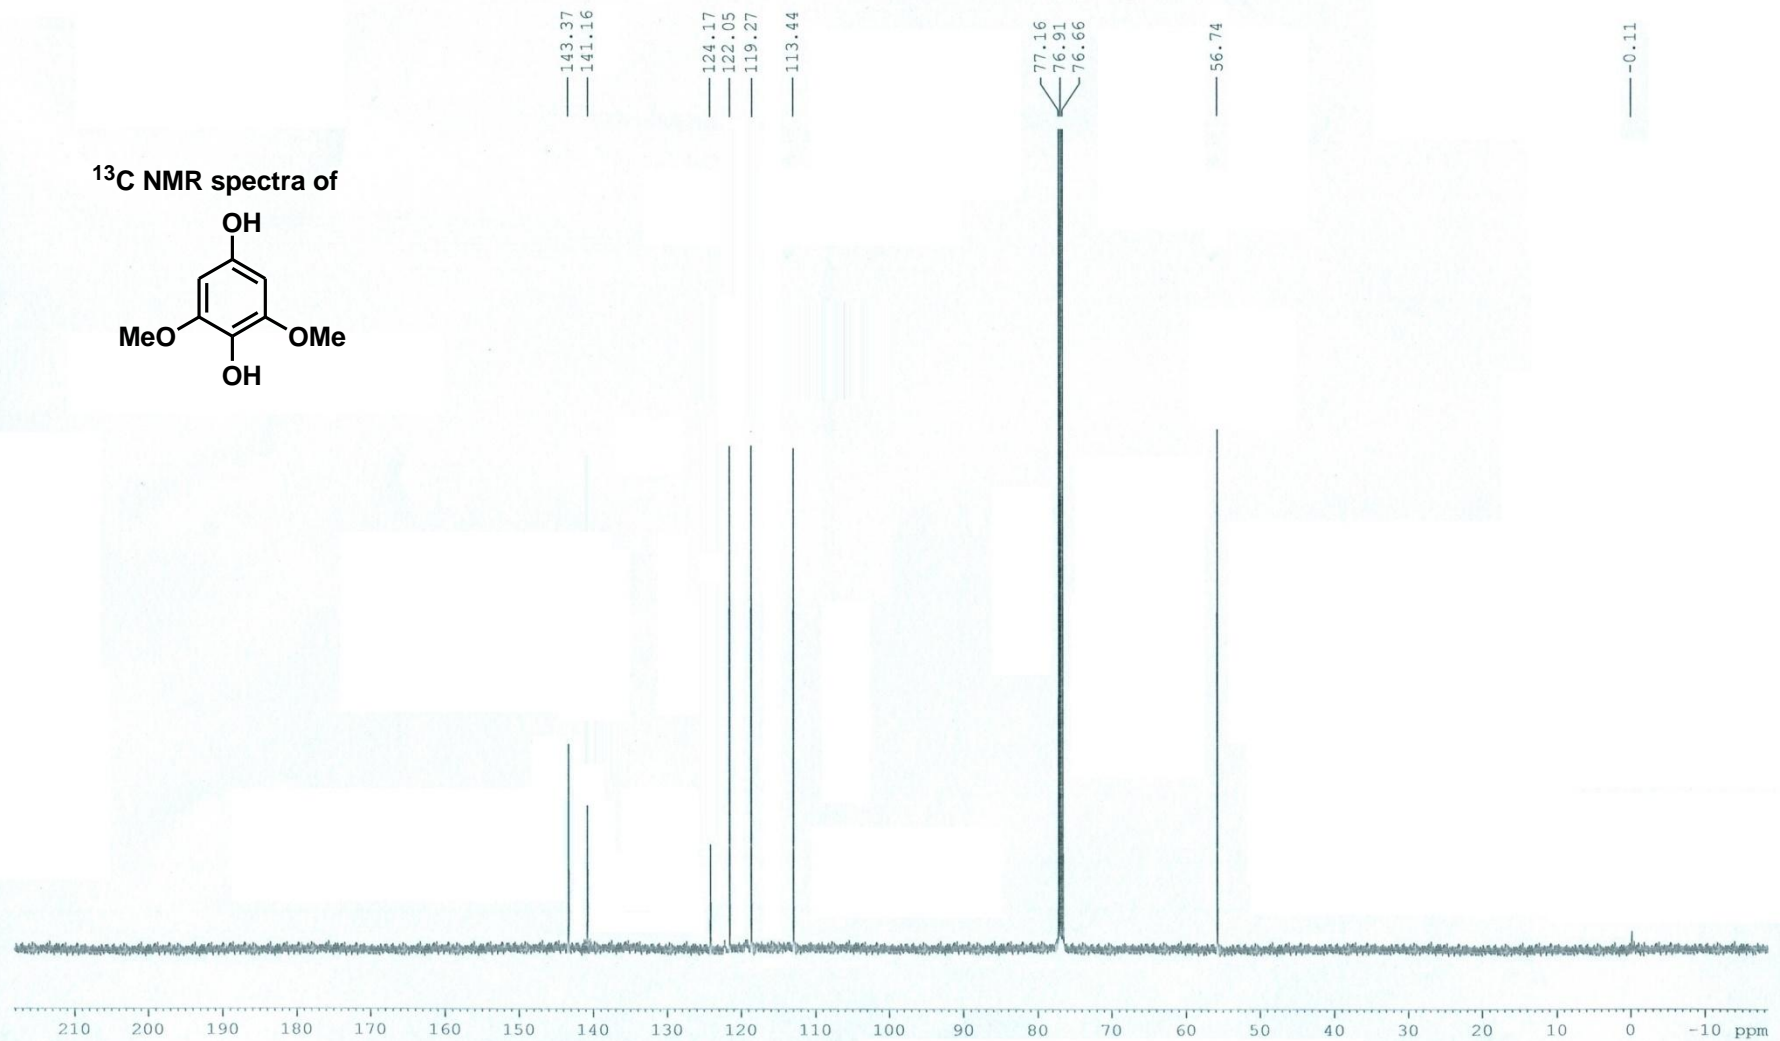

Supplement: c5ra20133k1.pdf [file c5ra20133k1.pdf]
